# Supplementary material for: Neuropsychiatric mutations delineate functional brain connectivity dimensions contributing to autism and schizophrenia
Source: bioRxiv or medRxiv preprint supplement (doi:10.1101/862615), 2020-07-25
Supplement: Supplementary file [file media-1.pdf]

## Supplementary Material, Methods, and Results

|                                                                                                                                                                              |           |
|------------------------------------------------------------------------------------------------------------------------------------------------------------------------------|-----------|
| <b>Supplemental Material and Methods</b>                                                                                                                                     | <b>1</b>  |
| Objectives and methods overview                                                                                                                                              | 1         |
| Samples                                                                                                                                                                      | 2         |
| 16p11.2 cohort                                                                                                                                                               | 2         |
| 22q11.2 cohort                                                                                                                                                               | 2         |
| Idiopathic ASD dataset                                                                                                                                                       | 3         |
| Idiopathic schizophrenia                                                                                                                                                     | 3         |
| Idiopathic ADHD                                                                                                                                                              | 4         |
| Preprocessing                                                                                                                                                                | 4         |
| Quality Control                                                                                                                                                              | 5         |
| Gene expression preparation and analyses                                                                                                                                     | 5         |
| <b>Supplemental Results</b>                                                                                                                                                  | <b>6</b>  |
| Figure 1: Sensitivity analyses on age distribution in 16p11.2 deletion carriers                                                                                              | 6         |
| Figure 2: Mirror effects of gene dosage in 16p11.2 CNV are present at the network level                                                                                      | 7         |
| Effect of Schizophrenia on FC                                                                                                                                                | 8         |
| Effect of ASD on FC                                                                                                                                                          | 8         |
| Sensitivity analysis testing the effect of medication on FC alterations in autism                                                                                            | 8         |
| Effect of ADHD on FC                                                                                                                                                         | 9         |
| Sensitivity analysis testing the effect of sex on FC alterations in SZ and ADHD                                                                                              | 9         |
| Figure 3a: Seed regions showing significant similarity between 16p11.2 deletion and Schizophrenia                                                                            | 10        |
| Figure 3b: Seed regions showing significant similarity between 22q11.2 deletion and Schizophrenia                                                                            | 12        |
| Figure 3c: Seed regions showing significant similarity between 16p11.2 deletion and Autism                                                                                   | 14        |
| Figure 3d: Seed regions showing significant similarity between 22q11.2 deletion and Autism                                                                                   | 15        |
| Figure 4 Do the same seed regions contribute to the similarity between either 16p11.2 or 22q11.2 deletions and individuals with SZ and ASD?                                  | 16        |
| Figure 5: Regional similarities between the individual FC profiles of subjects with a psychiatric diagnosis and FC-signatures of 16p11.2 and 22q11.2 duplications            | 17        |
| Figure 6: Similarity between the individual FC profiles of subjects with a psychiatric diagnosis and the FC-signatures of the 16p11.2 and 22q11.2 deletions and duplications | 19        |
| Figure 7: Loadings of 22q11.2 and 16p11.2 genes and brain regions on PC1                                                                                                     | 21        |
| Figure 8: Additional information on motion for each cohort after preprocessing                                                                                               | 22        |
| <b>References</b>                                                                                                                                                            | <b>23</b> |

## Supplemental Material and Methods

### Objectives and methods overview

| Aim                                                                                                           | Objective                                                                                             | Method                                                                                                                                                      |
|---------------------------------------------------------------------------------------------------------------|-------------------------------------------------------------------------------------------------------|-------------------------------------------------------------------------------------------------------------------------------------------------------------|
| AIM1. Characterize the impact of gene dosage on connectivity for CNVs at the 16p11.2 and 22q11.2 genomic loci | 1.1. Describe the effect of gene dosage at the 16p11.2 and 22q11.2 genomic loci on global FC.         | Connectome Wide Association Study (CWAS): Linear model contrasting CNV carriers with respective controls.                                                   |
|                                                                                                               | 1.2 Test if deletions and duplications have mirror effects at the connection level.                   |                                                                                                                                                             |
| AIM2. Test if FC-signatures of deletions represent dimensions observed in idiopathic ASD, SZ, or ADHD.        | 2.1 Characterize the effect size of idiopathic Autism, Schizophrenia, and ADHD on FC.                 | Same as 1.1<br>CWAS: Linear model contrasting cases of each psychiatric groups with respective controls.                                                    |
|                                                                                                               | 2.2 Test similarities between whole-brain connectomes of CNVs and idiopathic psychiatric conditions.  | Pearson correlation between beta maps obtained from each CWAS (case-control contrast) and individual connectomes of either cases or controls of each group. |
|                                                                                                               | 2.3 Investigate regions that contribute to similarities observed in 2.2                               | The same method used in 2.2 applied to each of the 64 regional FC patterns.                                                                                 |
|                                                                                                               | 2.4 Identify the relationship between regions identified in 2.3 and cognition                         | Pearson R computed in 2.3 was correlated to the cognitive measure of each individual                                                                        |
|                                                                                                               | 2.5 Compare the co-expression anatomical patterns of genes within the 16p11.2 CNV and the 22q11.2 CNV | Co-expression matrices for each CNV were obtained by correlating normalized expression values of 22 + 35 genes across 34 brain regions.                     |

## Samples

### 16p11.2 cohort

Imaging data of 16p11.2 CNV carriers and typically developing controls were acquired by the Simons variation in individuals project (VIP) consortium <sup>1</sup> across 2 sites. We excluded 44 individuals from the analysis due to insufficient quality of the imaging data (cf. Supplementary Methods, quality control). The final 16p11.2 sample includes 122 individuals. Over 90% of the deletion carriers and 69% of the duplication carriers met criteria for at least one clinical psychiatric diagnosis (Table 1). Control subjects were recruited from the general population (extra-familial subjects), and had no major DSM-V diagnosis. The duplication group includes 2 individuals with a triplication.

### 22q11.2 cohort

Imaging data of 22q11.2 CNV carriers and typically developing (TD) controls were acquired at the University of California, Los Angeles (UCLA). Patients were ascertained from the UCLA or Children's Hospital, Los Angeles Pediatric Genetics, Allergy/Immunology and/or Craniofacial Clinics. We excluded 16 individuals from the analysis due to insufficient quality of the imaging data (cf. Supplementary Methods, quality control). The final 22q11.2 sample includes 101 individuals. Demographically comparable TD comparison subjects were recruited from the same communities as patients via web-based advertisements and by posting flyers and brochures at local schools, pediatric clinics, and other community sites. Exclusion criteria for all study participants included significant neurological or medical conditions (unrelated to 22q11.2 mutation) that might affect brain structure, history of head injury with loss of consciousness, insufficient fluency in English, and/or substance or alcohol abuse or dependence within the past 6 months. The UCLA Institutional Review Board approved all study procedures and informed consent documents. Scanning was conducted on an identical 3 tesla Siemens Trio MRI scanner with a 12-channel head coil at the University of California at Los Angeles Brain Mapping Center or at the Center for Cognitive Neuroscience <sup>2</sup>.

## Idiopathic ASD dataset

The ABIDE dataset<sup>3</sup> is an aggregate sample of different studies including imaging and behavioural data for individuals with an ASD diagnosis and typically developing peers matched for age. Due to the small number of females in the ABIDE dataset, we excluded female individuals. To better account for biases in connectivity estimation due to differences in recording sites, subject age, and in scanner motion, we created age and motion-matched subsamples for each recording site in ABIDE of individuals that passed our quality control criteria. We then excluded recording sites with fewer than 20 individuals (10 ASD, 10 controls). Our final ABIDE sample thus includes 459 male individuals, 225 individuals with ASD and 234 healthy controls, from 10 recording sites.

## Idiopathic schizophrenia

We used fMRI data retrospectively aggregated from 10 distinct sites and studies. Brain imaging multi-state data were obtained through either the SchizConnect and OpenfMRI data sharing platforms (<http://schizconnect.org><sup>4</sup>; <https://openfmri.org><sup>5</sup>) or local scanning at the University of Montréal. All patients were diagnosed with SZ according to DSM-IV or DSM-V criteria, as a function of the time of study. Sites samples were obtained after subjects were selected in order to ensure even proportions of SZ patients and controls within each site (from N = 9 to N = 42 per group) and to reduce between-group differences with regards to gender ratio (74% vs. 75% males in patients and controls, respectively), age distribution (34 vs. 32 years old on average) and motion levels (averaged frame displacement: 0.16 vs. 0.14 mm). Such matching of SZ and controls subjects was achieved based on propensity scores. In total, we retained 242 SZ patients and 242 healthy controls in statistical analyses. Depending on the study, positive and negative symptoms were assessed with either with the Positive and negative syndrome scale (PANSS,<sup>6</sup>) or the Scales for the assessment of positive/negative symptoms (SAPS/SANS,<sup>7</sup>). In order to allow for group analyses, SAPS/SANS scores were converted into PANSS scores using published regression-based equations<sup>8</sup>.

## Idiopathic ADHD

We used data provided by the ADHD-200 Consortium and The Neuro Bureau ADHD-200 Preprocessed repository (8 cohorts [http://fcon\\_1000.projects.nitrc.org/indi/adhd200/](http://fcon_1000.projects.nitrc.org/indi/adhd200/)<sup>9</sup>). Data from seven sites were retained after exclusion of 184 individuals. We included in our study a total of 763 subjects, 289 patients diagnosed with ADHD and 474 healthy controls.

This database provided child and adolescent data. Scores related to ADHD symptoms were measured using Conner's Parent Rating Scale-Revised, Long Version (CPRS-LV<sup>10</sup>).

## Preprocessing

All datasets were preprocessed using the same parameters with the same Neuroimaging Analysis Kit (NIAK) version 0.12.4, an Octave-based open source processing and analysis pipeline<sup>11</sup>. The first four volumes of each rs-fMRI time series were discarded to allow for magnetization to reach a steady state. Each data set was corrected for differences in slice acquisition time. Head motion parameters were estimated by spatially re-aligning individual timepoints with the median volume in the time series. This reference median volume was then aligned with the individual anatomical T1 image, which in turn was co-registered onto the MNI152 template space using an initial affine transformation, followed by a nonlinear transformation. Finally, each individual timepoint was mapped to the MNI space<sup>12</sup> using the combined spatial transformations. Slow frequency drifts were modeled on the entire time series as discrete cosine basis functions with a 0.01 Hz high-pass cut-off. Timepoints with excessive in-scanner motion (greater than 0.5 mm framewise displacement) were then censored from the time series by removing the affected timepoint as well as the preceding and following two timepoints<sup>13</sup>. Nuisance covariates were regressed from the remaining time series: the previously estimated slow time drifts, the average signals in conservative masks of the white matter and lateral ventricles, and the first principal components (95% energy) of the estimated six rigid-body motion parameters and their squares. Data were then spatially smoothed with a 3D Gaussian kernel (FWHM = 6mm).

## Quality Control

Preprocessed data were visually controlled for quality of the co-registration, head motion, and related artifacts by one rater. Not all six datasets were examined by the same raters, yet all raters followed the same standardized quality-control procedure <sup>14</sup>. If there was co-registration failure of either the functional image to individual T1 or individual T1 to MNI template registration, we attempted a manual fix by changing the parameters of the preprocessing pipeline. Individuals were excluded from the analysis if co-registration errors could not be fixed. Individuals were also excluded from the analysis if the average framewise displacement after motion censoring exceeded 0.5 mm or if fewer than 40 time frames remained (Supplementary Materials and Methods).

## Gene expression preparation and analyses

Gene expression levels were initially computed for each of the 68 cortical regions of the Desikan Atlas, based on the Allen Brain Atlas <sup>15</sup> and accessed April 4th 2017 at [https://figshare.com/articles/A\\_FreeSurfer\\_view\\_of\\_the\\_cortical\\_transcriptome\\_generated\\_from\\_the\\_Allen\\_Human\\_Brain\\_Atlas/1439749](https://figshare.com/articles/A_FreeSurfer_view_of_the_cortical_transcriptome_generated_from_the_Allen_Human_Brain_Atlas/1439749) <sup>16</sup>). Because right hemisphere data were available for only three of the six donor brains, normalization was calculated for each gene by Z-scoring the expression levels across the 34 cortical regions of only the left hemisphere <sup>17</sup> (data available at <http://neanderthal.pasteur.fr>, Supplemental Table S4.1).

## Supplemental Results

Figure 1: Sensitivity analyses on age distribution in 16p11.2 deletion carriers

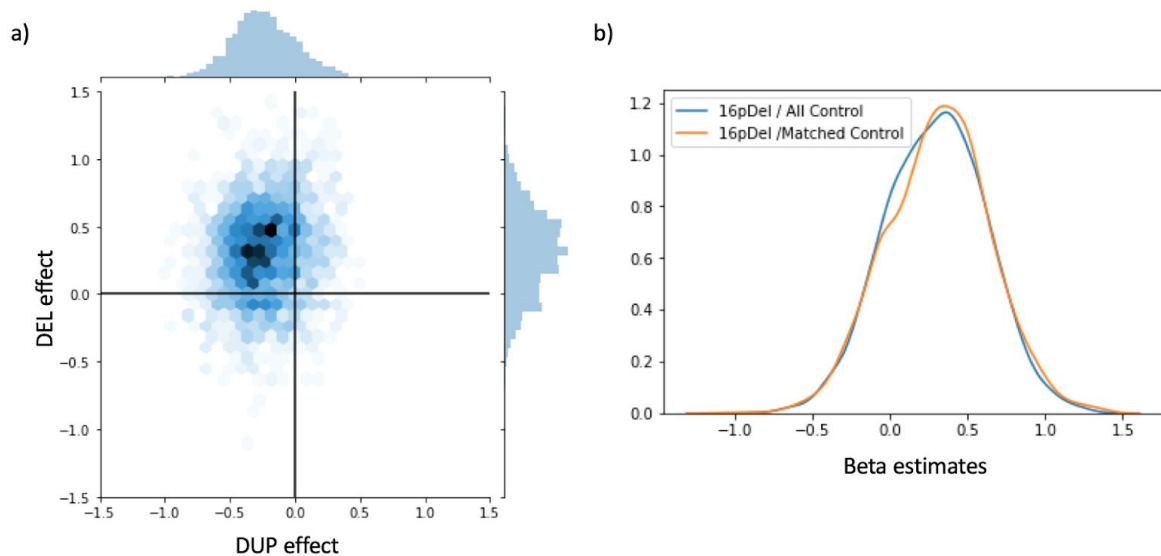

Legend: We performed a sensitivity analysis after excluding older controls to obtain identical age distributions (mean 12.7 and 13.0 years respectively) in the 16p11.2 deletions and control groups. The CWAS performed before and after excluding adults provides the same results albeit with decreased power: The 2 beta maps are highly correlated ( $r=0.967$ ) and their distribution (b) overlaps perfectly.

(a): Scatterplot (*hexagonal plot*), showing estimates (beta values) from connectome-wide association studies (CWAS) performed between 16p11.2 CNVs and their respective controls excluding adults to obtain a matched age distribution. The scatterplot is identical to figure 1.a demonstrating that age distribution does not affect our results.

Figure 2: Mirror effects of gene dosage in 16p11.2 CNV are present at the network level

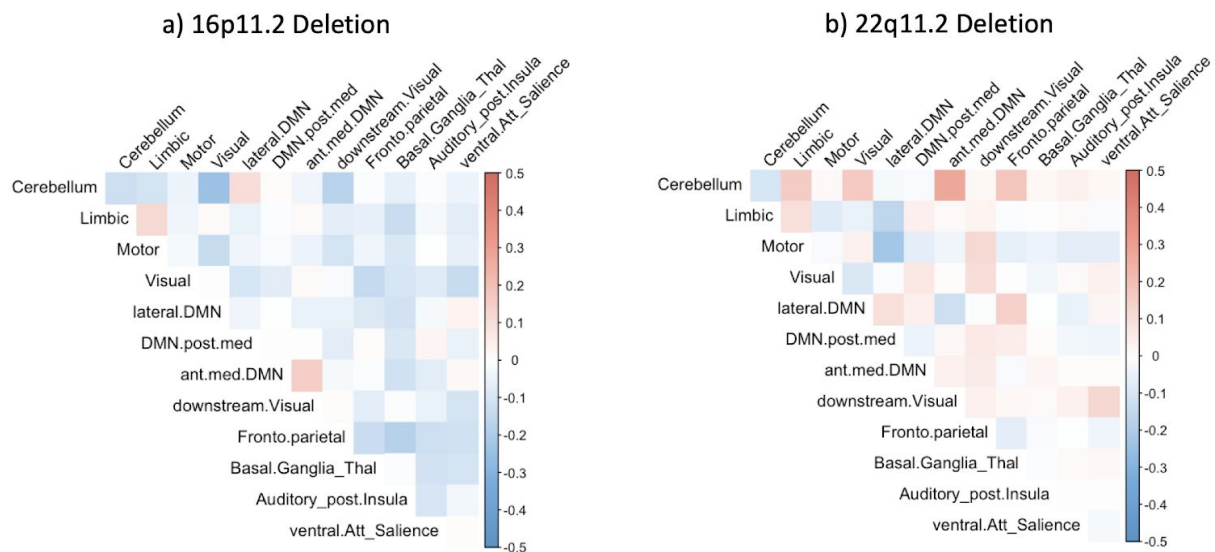

Legend:

We investigated how mirror effects of gene dosage at the individual network level follow the organization of the brain into canonical resting-state networks. Gene dosage effects at the connection level are shown broken down into the 12 corresponding functional brain networks (Supplementary Table S1.10) for the 16p11.2 (a) and 22q11.2 (b) genomic loci. Red colors reflect effects in the same direction for deletions and duplications. Blue colors reflect mirror effects for deletions and duplications (i.e. an increase in FC is associated with one, but a decrease is associated with the other). For the 16p11.2 CNVs, networks exhibited more mirror connectivity alterations than would be expected by chance ( $p = 0.006$ , two-sided). By contrast, 22q11.2 CNVs showed an equal number of connections with mirror and uni-directional alterations across networks.



## Effect of Schizophrenia on FC

Idiopathic SZ showed overall underconnectivity affecting 835 connections, with the strongest alterations affecting the frontoparietal, auditory, ventral attention and limbic networks (dorsal anterior cingulate cortex, dorsal anterior and posterior insula, ventral posterior insula, and inferior marginal sulcus sulcus) (Figures 3a, c, Supplementary Tables S1.7 and S1.9). Over-connectivity was restricted to 24 connections (cerebello-motor and thalamo-auditory), in line with previous reports<sup>18,19</sup> (859 connections survived FDR correction in total,  $q < 0.05$ ,  $p$  ranging from 0.02 to  $1e-12$ ).

## Effect of ASD on FC

Underconnectivity in ASD was driven by seed regions in the limbic, lateral DMN, and cerebellar networks and over-connectivity was observed in the basal ganglia and motor networks, in accordance with previous reports<sup>20</sup> (anterior middle frontal gyrus, temporal pole, anterior middle temporal gyri, lateral fusiform gyrus, and cerebellum VIII-ab) (Figure 3b, c, Supplementary Tables S1.6 and S1.9). Seventy-five connections (73 under and 2 overconnected) survived FDR correction ( $q < 0.05$ ), with  $p$  ranging from 0.01 to  $1e-5$ .

## Sensitivity analysis testing the effect of medication on FC alterations in autism

A sensitivity analysis testing the effect of medication was performed with excluding 55 individuals with autism and one control from the analysis. Connectome-wide analysis on the non-medicated subgroup showed overall underconnectivity. Underconnectivity was significant (FDR) in 28 connections. The beta map of this analysis was highly correlated ( $r = 0.96$ ) with the initial CWAS performed on the full sample including ASD subjects with medication.

## Effect of ADHD on FC

For ADHD, none of the individual connections survived FDR correction (nominally significant alterations were observed in the posterior middle temporal and lateral occipitotemporal gyri, posterior medial visual network, the cerebellum-VI and the left intraparietal sulcus) (Supplementary Tables S1.8 and S1.9).

## Sensitivity analysis testing the effect of sex on FC alterations in SZ and ADHD

A sensitivity analysis was performed on 179 male participants with schizophrenia and 189 male controls. Males with idiopathic SZ also show overall underconnectivity with 472 connections surviving FDR. The beta map of this analysis excluding females was highly correlated ( $r=0.95$ ) with the initial CWAS performed on the full sample.

The same analysis was performed in the ADHD sample. The beta map of the analysis excluding females was highly correlated ( $r=0.93$ ) with the initial CWAS performed on the full ADHD sample.

Figure 3a: Seed regions showing significant similarity between 16p11.2 deletion and Schizophrenia

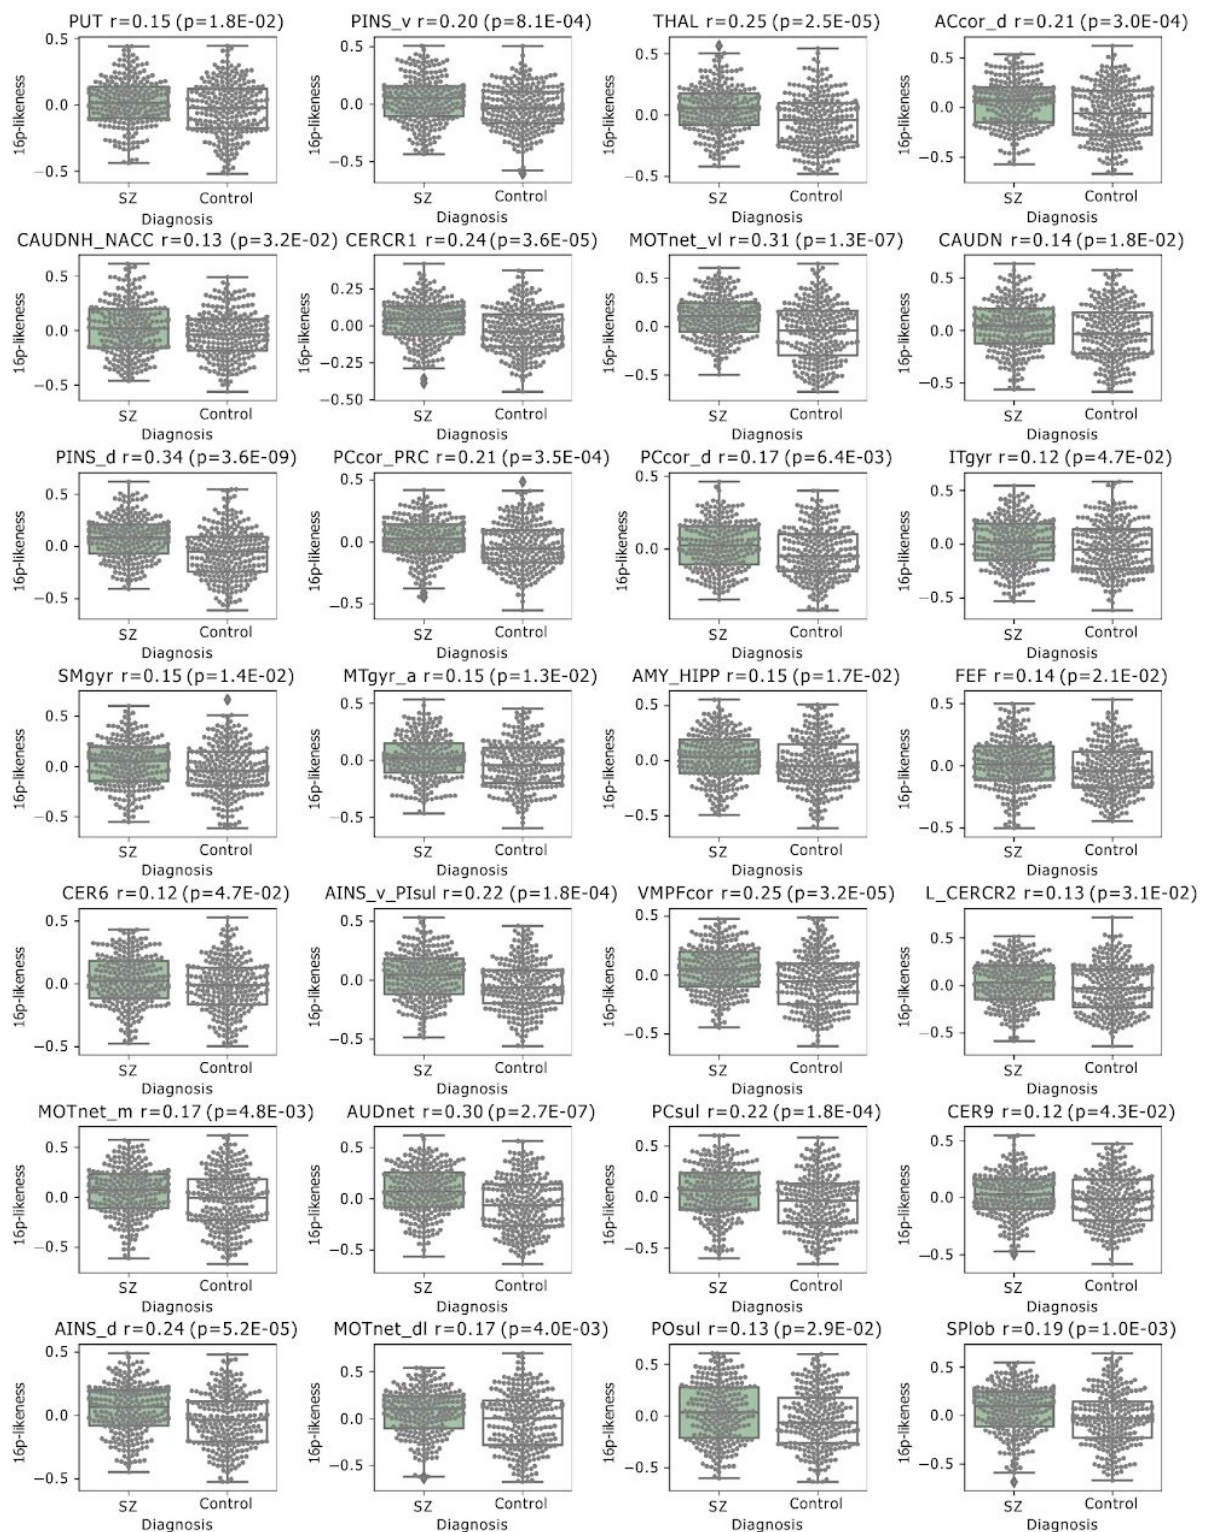

Legend: Similarities between regional FC of 16p11.2 deletions and individuals with idiopathic SZ compared to their respective controls. Grey dots correspond to individuals in either the SZ or control group. Boxplots for individuals with SZ (green) and their respective controls (white) illustrate the observed group differences in similarity values. Similarity values (Pearson's R, Grey dots) were derived by computing Pearson's correlations between the regional FC-signatures. Differences between SZ or controls are tested using a Mann-Whitney U test. We reported significant group differences after FDR correction accounting for the 64 regions ( $q < 0.05$ ).

Figure 3b: Seed regions showing significant similarity between 22q11.2 deletion and Schizophrenia

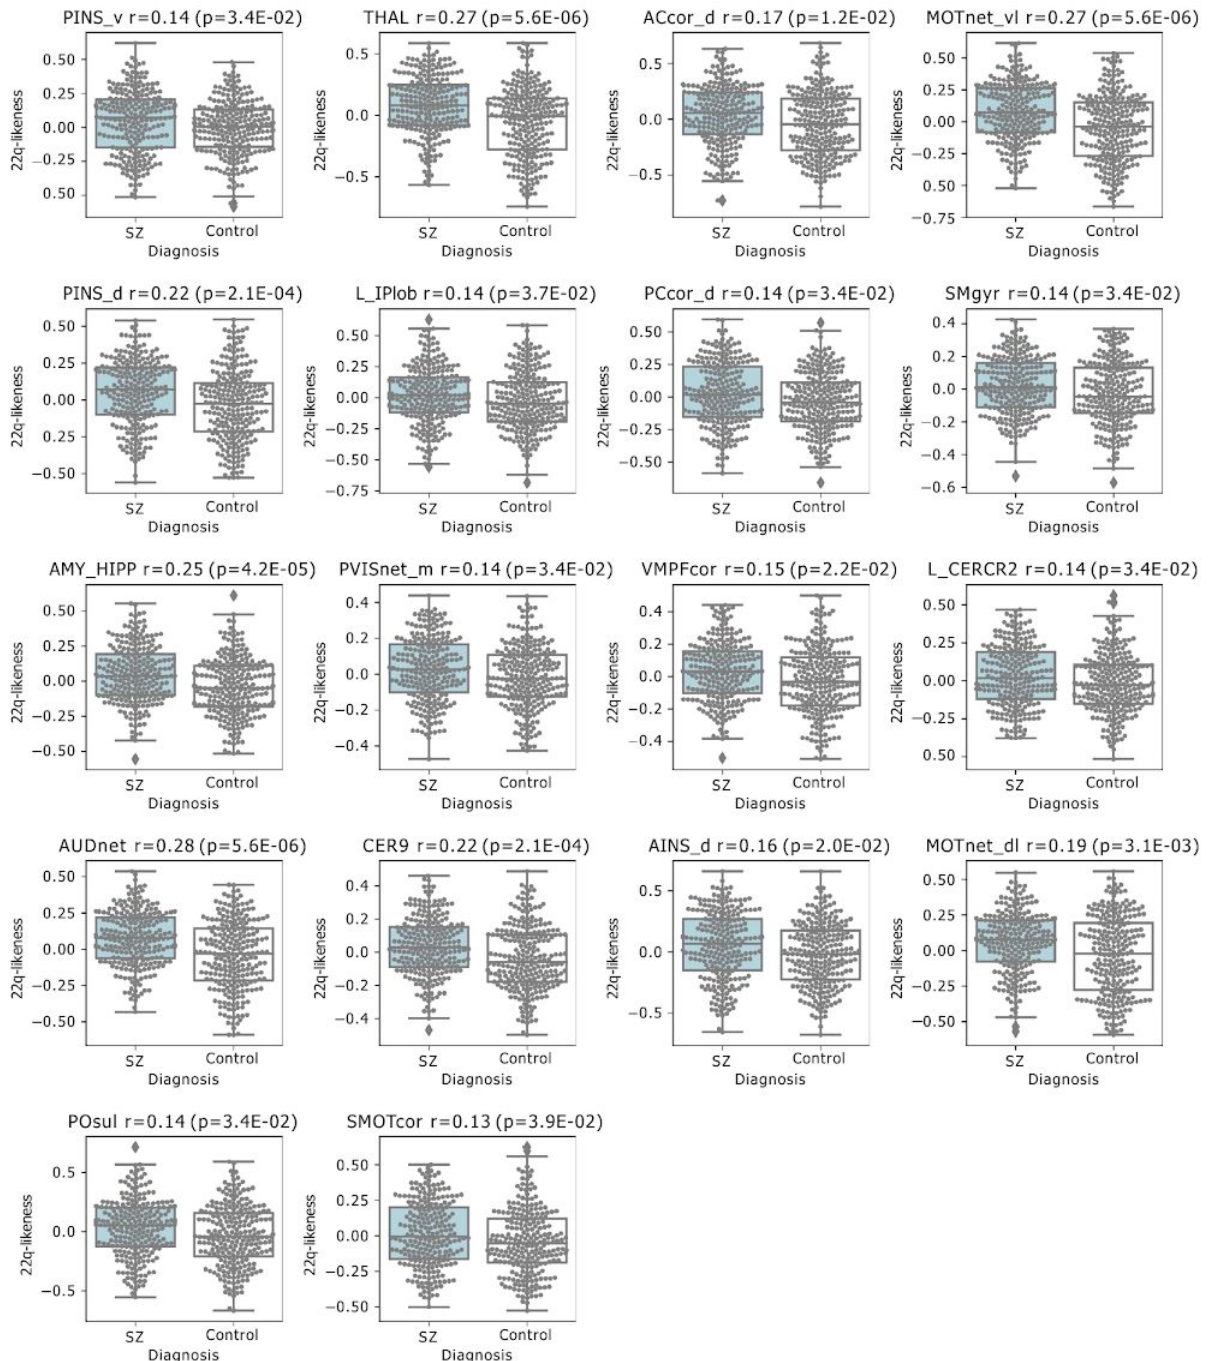

Legend: Similarities between regional FC of 22q11.2 deletions and individuals with SZ compared to controls. Grey dots correspond to individuals in either the SZ or control group. Box plots for

individuals with SZ (blue) and their respective controls (white) illustrate the observed group differences in similarity values.

Similarity values (Pearson's R, Grey dots) were derived by computing Pearson's correlations between the regional FC-signatures. Differences between SZ or controls are tested using a Mann-Whitney U test. We reported significant group differences after FDR correction accounting for the 64 regions ( $q < 0.05$ ).

Figure 3c: Seed regions showing significant similarity between 16p11.2 deletion and Autism

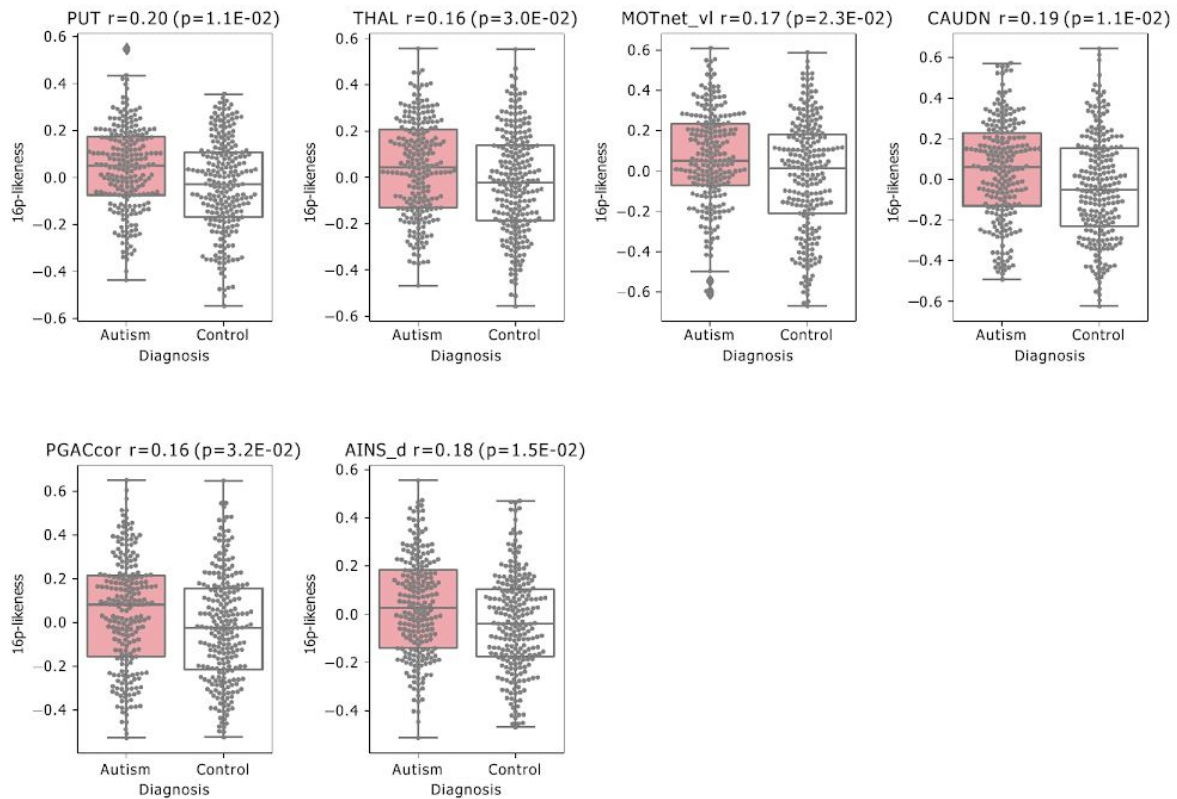

Legend: Similarities between regional FC of 16p11.2 deletions and individuals with ASD compared to controls are shown. Grey dots correspond to individuals in either the ASD or control group. Box plots for individuals with ASD (red) and their respective controls (white) illustrate the observed group differences in similarity values. Similarity values (Pearson's R, Grey dots) were derived by computing Pearson's correlations between the regional FC-signatures. Differences between SZ or controls are tested using a Mann-Whitney U test. We reported significant group differences after FDR correction accounting for the 64 regions ( $q < 0.05$ ).

Figure 3d: Seed regions showing significant similarity between 22q11.2 deletion and Autism

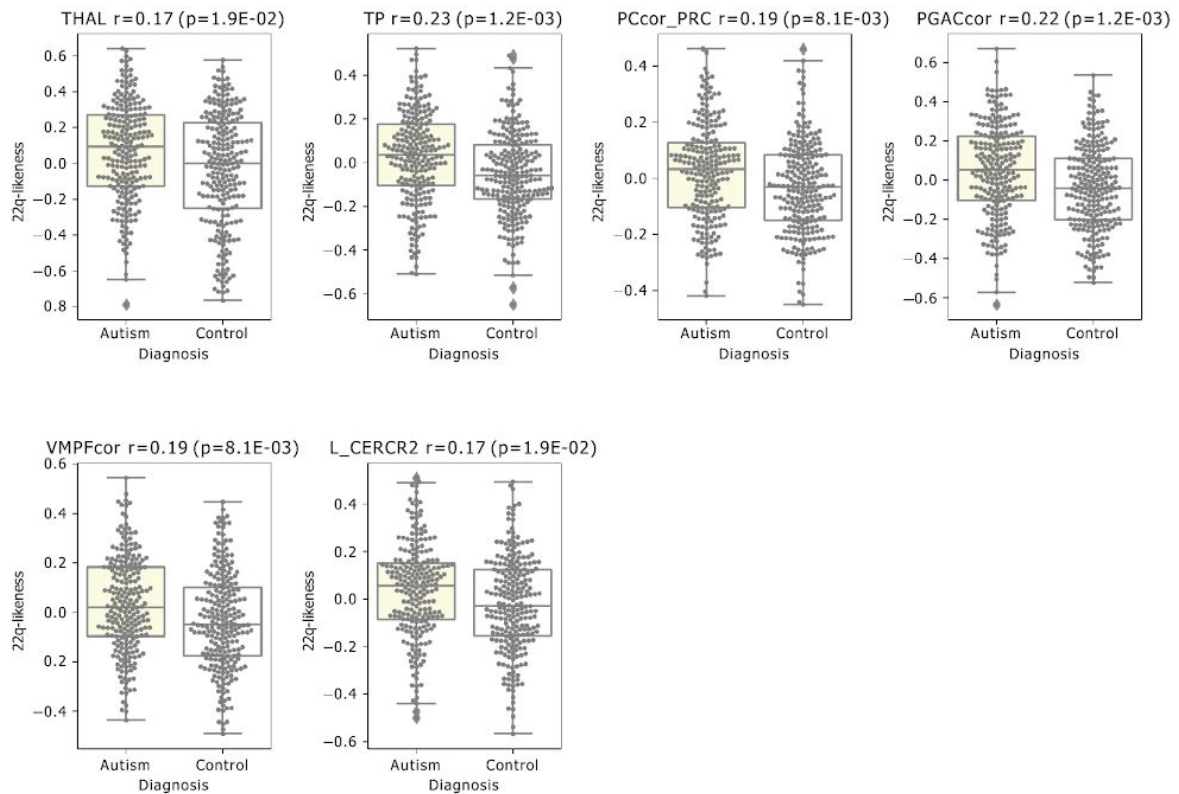

Legend: Similarities between regional FC of 22q11.2 deletions and individuals with ASD compared to controls are shown. Grey dots correspond to individuals in either the ASD or control group. Box plots for individuals with ASD (yellow) and their respective controls (white) illustrate the observed group differences in similarity values. Similarity values (Pearson's R, Grey dots) were derived by computing Pearson's correlations between the regional FC-signatures. Differences between SZ or controls are tested using a Mann-Whitney U test. We reported significant group differences after FDR correction accounting for the 64 regions ( $q < 0.05$ ).



Figure 4 Do the same seed regions contribute to the similarity between either 16p11.2 or 22q11.2 deletions and individuals with SZ and ASD?

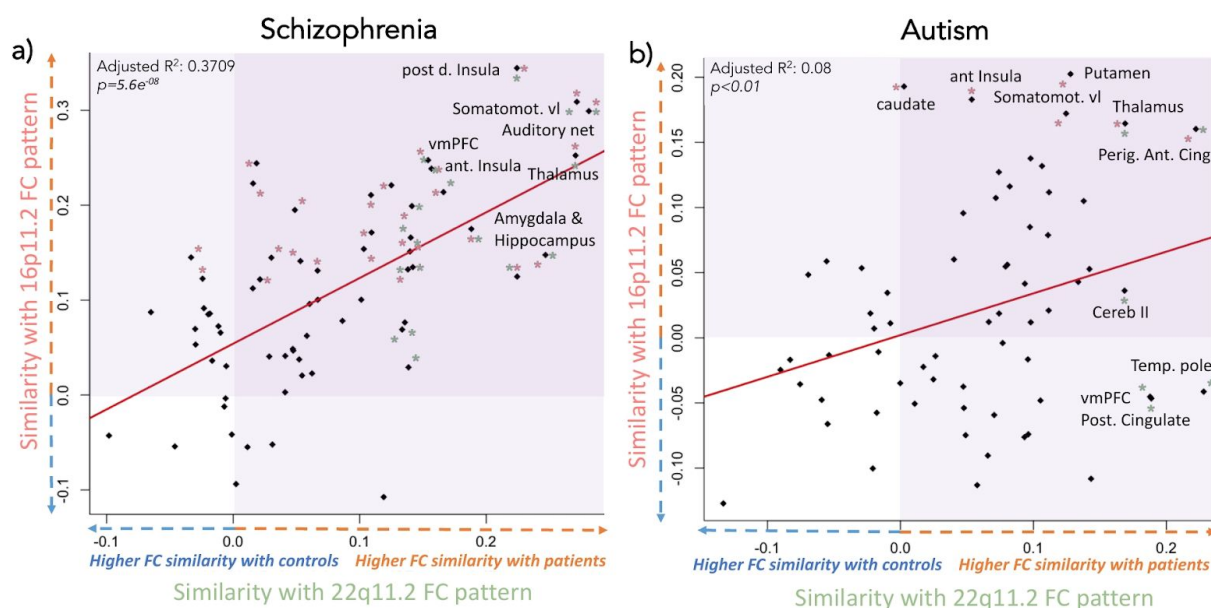

Legend: Many of the same seed regions contribute to the similarity between either 16p11.2 or 22q11.2 deletions and individuals with SZ (a). This is less the case for autism.

The horizontal axes show the Mann whitney effect size (rank biserial correlation) representing the connectivity similarity between the 22q11.2 deletion FC-signature and individuals with idiopathic SZ (a) or ASD (b) compared to controls. The vertical axes show values (biserial correlation) representing the connectivity similarity with the 16p11.2 deletion FC-signature and individuals with idiopathic ASD (a) or SZ (b) compared to controls. Positive values (orange arrows) on the horizontal and vertical axes represent higher connectivity similarity between the deletion FC-signatures and individuals with SZ (a) or ASD (b) compared to their respective controls. Negative values (blue arrows) represent a higher similarity with control individuals. Seed-based connectivity signatures that show significant (FDR corrected) connectivity similarity with deletions are colored (pink stars for 16p11.2 and green stars for 22q11.2).

Figure 5: Regional similarities between the individual FC profiles of subjects with a psychiatric diagnosis and FC-signatures of 16p11.2 and 22q11.2 duplications

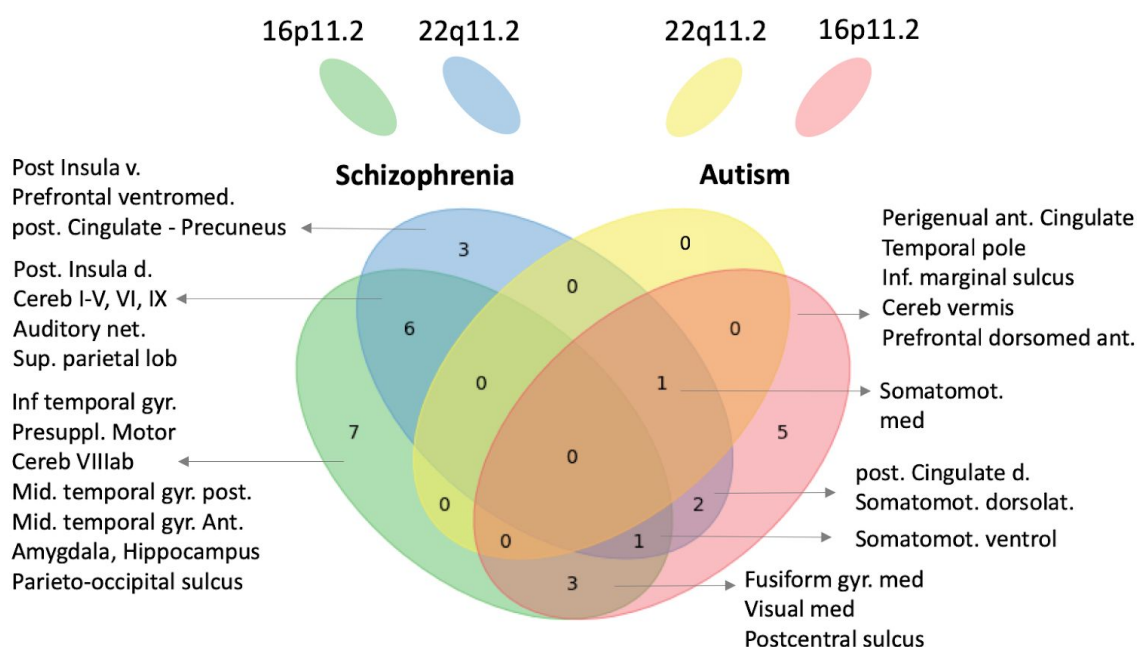

Legend: The FC-signatures of both duplications (group level) were decomposed into 64 seed-regions.

Deletion FC-signatures are correlated to the individual connectomes of subjects with either ASD, SZ or control subjects. Of note, the correlation results in the mean centering of all region-based FC-signatures. Significantly increased similarities with either ASD and SZ are presented on the right and the left side of the diagram, respectively.

Some of these regions overlap with those identified in the same analysis using FC-signatures of both deletions: SZ individuals show similarities with both 16p11.2 deletion and duplication for 2 regions (Inferior and middle temporal gyrus)

SZ individuals show similarities with both 22q11.2 duplication and deletion for 6 regions (ventral / dorsal posterior insula, ventromedial prefrontal cortex, dorsolateral somatomotor cortex, cerebellum IX, auditory network) and with 16p11.2 duplication and deletions for 9 regions (parieto occipital

*Neuropsychiatric mutations delineate FC dimensions contributing to autism and schizophrenia*

sulcus, amygdala/ hippocampus, inf & middle gyrus anterior and posterior temporal gyrus, superior parietal lobule, cerebellum VI, posterior insula, dorsal prefrontal ventro medial cortex). ASD individuals show similarities with both 16p11.2 deletion and duplication for 2 regions perigenual anterior cingulate cortex, ventrolateral somatomotor cortex.

For 11 regions, controls rather than individuals with ASD or SZ showed increased similarities with duplications. This increased similarity with controls was never observed for deletion FC-signatures.

Figure 6: Similarity between the individual FC profiles of subjects with a psychiatric diagnosis and the FC-signatures of the 16p11.2 and 22q11.2 deletions and duplications

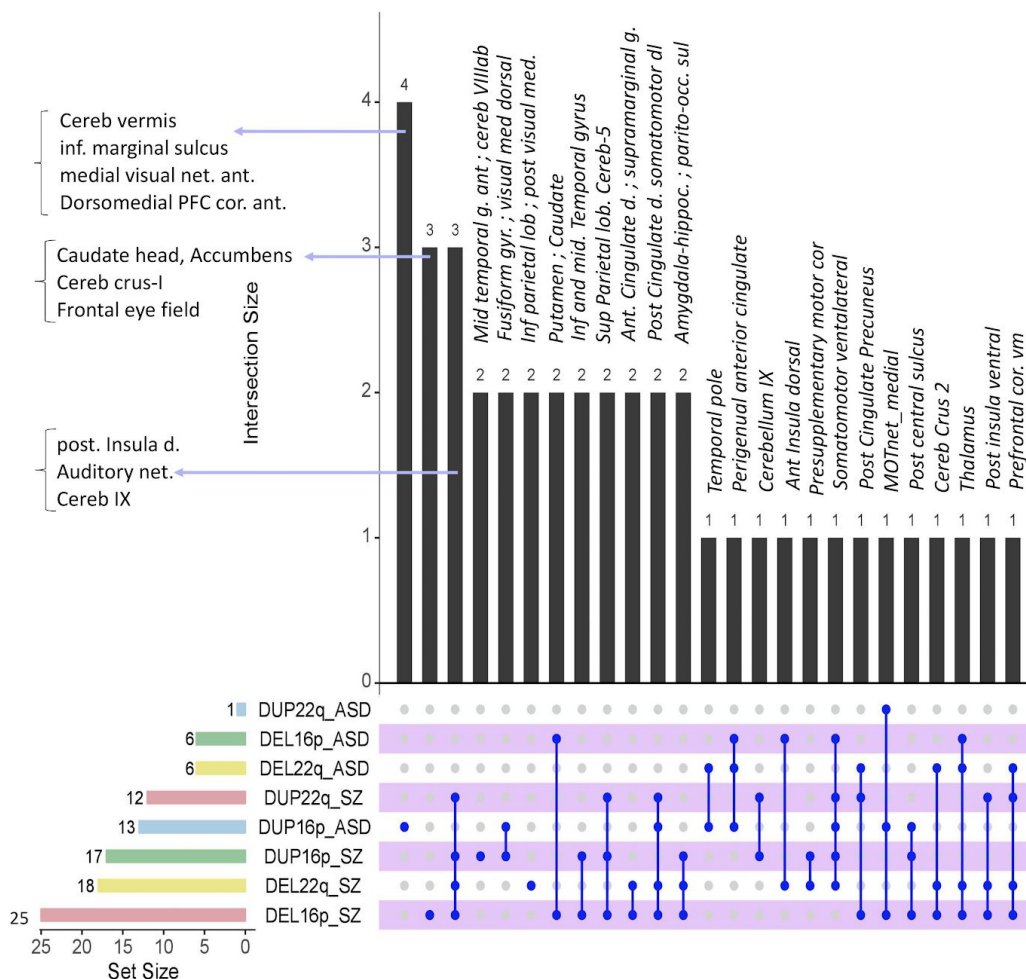

Legend: Because a Venn diagram showing overlapping brain regions across 8 comparisons (conditions, dels and dups) is impractical, we used the UpSet R package<sup>21</sup> to combine results from both Venn-Diagram (presented in Figure 4 (deletion) and in Supplementary Figure 6 (duplication)).

The dark blue lines and points show regions contributing to several similarities.

The 8 rows represent the 8 comparisons between the 4 CNVs and idiopathic ASD or SZ.

*Neuropsychiatric mutations delineate FC dimensions contributing to autism and schizophrenia*

For example, the 23rd vertical black bar represents the thalamus which contributes to similarities across 4 comparisons (the 4 connected dark blue dots, representing the 16p11.2 and 22q11.2 deletion-FC-similarity with either ASD or SZ).

Horizontal bars on the bottom left represent the number of seed regions showing significant similarities for each comparison (eg. 6 regions showed similarity between 16p11.2 deletion-FC-signatures and ASD-FC-profiles). Y axis: number of regions showing similarities between CNV carriers and idiopathic SZ or ASD.

Figure 7: Loadings of 22q11.2 and 16p11.2 genes and brain regions on PC1

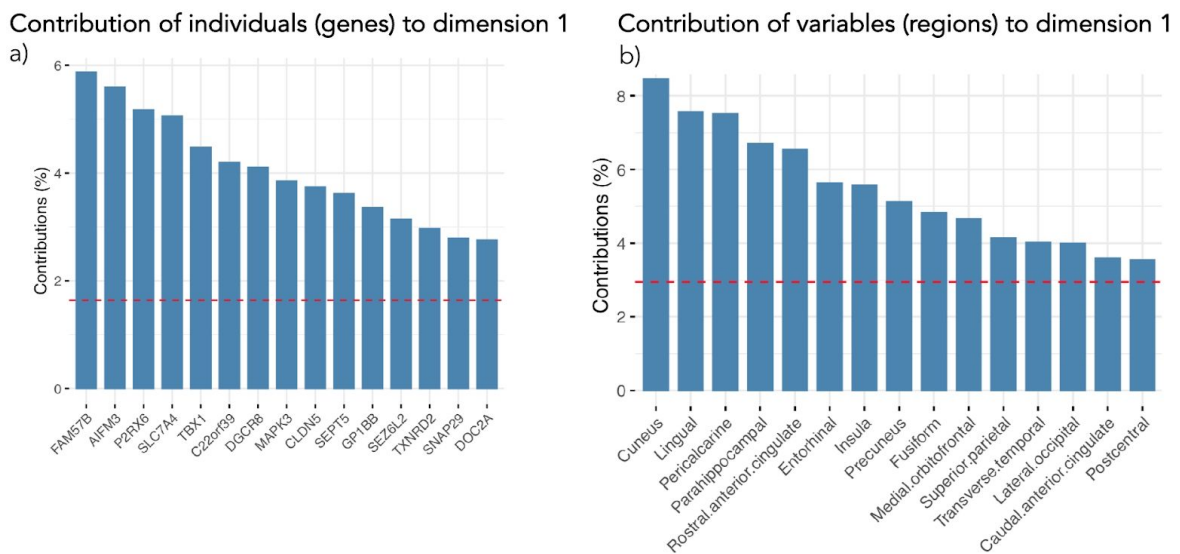

Legend: Contribution of top genes within 16p11.2 and 22q11.2 loci (a), and top neuroanatomical regions (b) to the first Principal Component. PCA was computed using expression values (individuals) of 57 genes encompassed in both genomic loci across 34 brain regions (variables). We used the R “psych” package<sup>22</sup>.

Figure 8: Additional information on motion for each cohort after preprocessing

|                   | ADHD | CON  | SZ  | CON | ASD  | CON  | 16PDEL | 16PDUP | 16PCON | 22QDEL | 22QDUP | 22QCON |
|-------------------|------|------|-----|-----|------|------|--------|--------|--------|--------|--------|--------|
| Mean (frames)     | 160  | 159  | 152 | 166 | 139  | 153  | 83     | 83     | 85     | 110    | 121    | 126    |
| Sd (frames)       | 53   | 59   | 50  | 49  | 52   | 49   | 18     | 23     | 20     | 42     | 34     | 30     |
| Mean (% scrubbed) | 0.13 | 0.25 | *   | *   | 0.24 | 0.16 | 0.26   | 0.25   | 0.23   | 0.25   | 0.18   | 0.14   |
| Sd (% scrubbed)   | 0.15 | 0.26 | *   | *   | 0.23 | 0.18 | 0.15   | 0.2    | 0.16   | 0.28   | 0.22   | 0.2    |

Mean (frames): mean number of frames remaining after scrubbing per individual; Mean (% scrubbed): Mean percentage of frames excluded per individual; SD: Standard Deviation; 16PDEL: 16p11.2 deletion; 16PCON: 16p11.2 control; 16PDUP: 16p11.2 duplication; 22QDEL: 22QCON: 22q11.2 control; 22q11.2 deletion; 22QDUP: 22q11.2 duplication.

## References

1. Simons Vip Consortium. Simons Variation in Individuals Project (Simons VIP): a genetics-first approach to studying autism spectrum and related neurodevelopmental disorders. *Neuron* **73**, 1063–1067 (2012).
2. Lin, A. *et al.* Mapping 22q11.2 Gene Dosage Effects on Brain Morphometry. *J. Neurosci.* **37**, 6183–6199 (2017).
3. Di Martino, A. *et al.* The autism brain imaging data exchange: towards a large-scale evaluation of the intrinsic brain architecture in autism. *Mol. Psychiatry* **19**, 659–667 (2014).
4. Wang, L. *et al.* SchizConnect: Mediating neuroimaging databases on schizophrenia and related disorders for large-scale integration. *Neuroimage* **124**, 1155–1167 (2016).
5. Poldrack, R. A. *et al.* Toward open sharing of task-based fMRI data: the OpenfMRI project. *Front. Neuroinform.* **7**, 12 (2013).
6. Kay, S. R., Fiszbein, A. & Opler, L. A. The positive and negative syndrome scale (PANSS) for schizophrenia. *Schizophr. Bull.* **13**, 261–276 (1987).
7. Andreasen, N. C. The Scale for the Assessment of Negative Symptoms (SANS): conceptual and theoretical foundations. *Br. J. Psychiatry Suppl.* 49–58 (1989). doi:10.1192/S0007125000291496
8. van Erp, T. G. M. *et al.* Converting positive and negative symptom scores between PANSS and SAPS/SANS. *Schizophr. Res.* **152**, 289–294 (2014).
9. ADHD-200 Consortium. The ADHD-200 Consortium: A Model to Advance the Translational Potential of Neuroimaging in Clinical Neuroscience. *Front. Syst. Neurosci.* **6**, 62 (2012).
10. Conners, C. K., Sitarenios, G., Parker, J. D. & Epstein, J. N. The revised Conners' Parent Rating Scale (CPRS-R): factor structure, reliability, and criterion validity. *J. Abnorm. Child Psychol.* **26**, 257–268 (1998).
11. Bellec, P. *et al.* A neuroimaging analysis kit for Matlab and Octave. in *Proceedings of the 17th International Conference on Functional Mapping of the Human Brain* 2735–2746 (2011).



12. Fonov, V. S., Evans, A. C., McKinstry, R. C., Almlri, C. R. & Collins, D. L. Unbiased nonlinear average age-appropriate brain templates from birth to adulthood. *Neuroimage* **47**, S102 (2009).
13. Power, J. D., Barnes, K. A., Snyder, A. Z., Schlaggar, B. L. & Petersen, S. E. Spurious but systematic correlations in functional connectivity MRI networks arise from subject motion. *Neuroimage* **59**, 2142–2154 (2011).
14. Benhajali, Y. & Bellec, P. Quality Control and assessment of the NIAK functional MRI preprocessing pipeline. (2016). doi:10.6084/m9.figshare.4204845.v1
15. Hawrylycz, M. *et al.* Canonical genetic signatures of the adult human brain. *Nat. Neurosci.* **18**, 1832 (2015).
16. French, L. & Paus, T. A FreeSurfer view of the cortical transcriptome generated from the Allen Human Brain Atlas. *Front. Neurosci.* **9**, 323 (2015).
17. Dumas, G., Malesys, S. & Bourgeron, T. Systematic detection of divergent brain proteins in human evolution and their roles in cognition. *bioRxiv* 658658 (2019). doi:10.1101/658658
18. Ferri, J. *et al.* Resting-state thalamic dysconnectivity in schizophrenia and relationships with symptoms. *Psychol. Med.* **48**, 2492–2499 (2018).
19. Giraldo-Chica, M. & Woodward, N. D. Review of thalamocortical resting-state fMRI studies in schizophrenia. *Schizophr. Res.* **180**, 58–63 (2017).
20. Di Martino, A. *et al.* Aberrant striatal functional connectivity in children with autism. *Biol. Psychiatry* **69**, 847–856 (2011).
21. Conway, J. R., Lex, A. & Gehlenborg, N. UpSetR: an R package for the visualization of intersecting sets and their properties. *Bioinformatics* **33**, 2938–2940 (2017).
22. Revelle, W. R. *psych: Procedures for Personality and Psychological Research.* (2017).

















**Table S1.8** Seed regions ranked by the average absolute effect size estimate in each of the 7 CWAS

| Region SZ | ASD                   | ADHD                             | 16pDel                   | 16pDup                       | 22qDel                          | 22qDup                                        |                                                              |
|-----------|-----------------------|----------------------------------|--------------------------|------------------------------|---------------------------------|-----------------------------------------------|--------------------------------------------------------------|
| 1         | ANTERIOR_C_MIDDLE_TEV | MIDDLE_TEMPORAL_GYRI             | FRONTAL_PC               | MIDDLE_TEV                   | TEMPORAL_I                      | MEDIAL_VISUAL_NETWORK_posterior               |                                                              |
| 2         | POSTERIOR_TEMPORAL_I  | left_INTRAPARIETAL_SULC          | CAUDATE_NI               | left_INTRAP/                 | PERIGENUAL                      | CEREBELLUM_I-V                                |                                                              |
| 3         | POSTERIOR_MIDDLE_FRC  | POSTERIOR_VISUAL_NETV            | PUTAMEN                  | POSTERIOR_                   | ANTERIOR_II                     | POSTERIOR_VISUAL_NETWORK_lateral              |                                                              |
| 4         | ANTERIOR_II           | CEREBELLUM_CEREBELLUM_VI         | MIDDLE_FRC               | CEREBELLUM                   | ANTERIOR_C                      | FUSIFORM_GYRUS_lateral                        |                                                              |
| 5         | INFERIOR_M            | FUSIFORM_C                       | OCCIPITOTEMPORAL_GYRI    | ANTERIOR_C                   | OCCIPITOTEN                     | AMYGDALA_LATERAL_VISUAL_NETWORK_anterior      |                                                              |
| 6         | PARIETO_OC            | right_INFERII                    | VISUAL_NETWORK_medio     | CEREBELLUM                   | VISUAL_NET                      | VENTRAL_M                                     | INFERIOR_TEMPORAL_GYRUS                                      |
| 7         | SUPRAMARG             | DORSOMEDI                        | FRONTAL_EYE_FIELD        | LATERAL_VIS                  | FRONTAL_EY                      | INFERIOR_TI                                   | CEREBELLUM_VI                                                |
| 8         | MEDIAL_VISI           | FRONTAL_PC                       | AMYGDALA_and_HIPPOCA     | VENTROLATE                   | AMYGDALA_C                      | CEREBELLUM                                    | ORBITOFRONTAL_CORTEX                                         |
| 9         | ANTERIOR_II           | PERIGENUAL                       | MIDDLE_TEMPORAL_GYRI     | PERIGENUAL                   | MIDDLE_TEV                      | FUSIFORM_C                                    | POSTERIOR_INSULA_dorsal                                      |
| 10        | PERIGENUAL            | OCCIPITOTEN                      | SUPRAMARGINAL_GYRUS      | left_INTRAP/                 | SUPRAMARG                       | CAUDATE_NI                                    | OCCIPITOTEMPORAL_GYRUS_lateral                               |
| 11        | PRE_SUPPLEI           | SUPERIOR_F                       | INFERIOR_TEMPORAL_GYI    | OCCIPITOTEN                  | INFERIOR_TI                     | DORSOMEDI                                     | AUDITORY_NETWORK                                             |
| 12        | right_INTRAF          | VISUAL_NET                       | POSTERIOR_CINGULATE_C    | CEREBELLUM                   | POSTERIOR_SUPERIOR_P            | SUPRAMARGINAL_GYRUS                           |                                                              |
| 13        | CEREBELLUM            | VENTRAL_M                        | left_INFERIOR_PARIETAL_C | CEREBELLUM                   | left_INFERIO                    | MIDDLE_TEN                                    | POSTERIOR_CINGULATE_CORTEX_dorsal                            |
| 14        | DORSOMEDI             | CEREBELLUM                       | POSTERIOR_CINGULATE_C    | DORSAL_VIS                   | POSTERIOR_CEREBELLUM            | MIDDLE_TEMPORAL_GYRUS_anterior                |                                                              |
| 15        | POSTCENTR/            | AMYGDALA_POSTERIOR_INSULA_dors   | SOMATOMO                 | POSTERIOR_FRONTAL_PC         | AMYGDALA_and_HIPPOCAMPUS        |                                               |                                                              |
| 16        | MIDDLE_TEN            | AUDITORY_h                       | CAUDATE_NUCLEUS          | POSTERIOR_CAUDATE_NI         | DORSOMEDI                       | left_INFERIOR_PARIETAL_LOBULE                 |                                                              |
| 17        | TEMPORAL_I            | LATERAL_VIS                      | FUSIFORM_GYRUS_media     | VISUAL_NET                   | FUSIFORM_C                      | MIDDLE_FRC                                    | FRONTAL_EYE_FIELD                                            |
| 18        | CEREBELLUM            | CEREBELLUM                       | CEREBELLUM_VIIB          | AUDITORY_h                   | CEREBELLUM                      | CEREBELLUM                                    | POSTERIOR_CINGULATE_CORTEX_and_PRECUNEUS                     |
| 19        | INFERIOR_TI           | MEDIAL_VISI                      | SOMATOMOTOR_NETWORKO     | MEDIAL_VISI                  | SOMATOMO                        | CEREBELLUM                                    | VISUAL_NETWORK_mediodorsal                                   |
| 20        | AMYGDALA_POSTERIOR    | left_INFERIOR_FRONTAL_           | AMYGDALA_left_INFERIO    | ORBITOFRONT                  | MIDDLE_TEMPORAL_GYRUS_posterior |                                               |                                                              |
| 21        | MIDDLE_TEN            | right_INTRAF                     | CEREBELLUM_CRUSI         | CEREBELLUM                   | CEREBELLUM                      | MEDIAL_VISI                                   | FUSIFORM_GYRUS_medial                                        |
| 22        | PRECUNEUS             | ANTERIOR_II                      | CEREBELLUM_CRUSII_righ   | FRONTAL_EY                   | CEREBELLUM                      | MIDDLE_TEN                                    | CEREBELLUM_VIIB                                              |
| 23        | right_INFERII         | SOMATOMO                         | DORSOMEDIAL_PREFRON      | right_MIDDLI                 | DORSOMEDI                       | POSTERIOR_SOMATOMOTOR_NETWORK                 | ventrolateral                                                |
| 24        | PUTAMEN               | PARIETO_OC                       | TEMPORAL_POLE            | SUPRAMARG                    | TEMPORAL_I                      | ANTERIOR_II                                   | left_INFERIOR_FRONTAL_SULCUS                                 |
| 25        | AUDITORY_h            | ANTERIOR_C                       | CAUDATE_NUCLEUS_HEAT     | LATERAL_VIS                  | CAUDATE_NI                      | POSTERIOR_CEREBELLUM_CRUSI                    |                                                              |
| 26        | POSTERIOR_SUPRAMARG   | ANTERIOR_CINGULATE_C             | INFERIOR_M               | ANTERIOR_C                   | PRE_SUPPLEI                     | CEREBELLUM_CRUSII_right                       |                                                              |
| 27        | right_INFERII         | POSTERIOR_CEREBELLUM_I-V         | FUSIFORM_C               | CEREBELLUM                   | SOMATOMO                        | DORSOMEDIAL_PREFRONTAL_CORTEX_posterior       |                                                              |
| 28        | SUPERIOR_P            | THALAMUS_CEREBELLUM_VIIB         | POSTCENTR/               | CEREBELLUM                   | CEREBELLUM                      | TEMPORAL_POLE                                 |                                                              |
| 29        | CEREBELLUM            | MIDDLE_TEV                       | THALAMUS                 | ANTERIOR_II                  | THALAMUS                        | SOMATOMO                                      | CAUDATE_NUCLEUS_HEAD_and_NUCLEUS_ACCUMBENS                   |
| 30        | left_INFERIO          | INFERIOR_M                       | CEREBELLUM_VERMIS        | SUPERIOR_P                   | CEREBELLUM                      | VENTROLATE                                    | ANTERIOR_CINGULATE_CORTEX_dorsal                             |
| 31        | SOMATOMO              | LATERAL_VIS                      | POSTERIOR_INSULA_ventr   | POSTERIOR_POSTERIOR_SOMATOMO | CEREBELLUM_VIIB                 |                                               |                                                              |
| 32        | FUSIFORM_C            | DORSAL_VISI                      | right_INFERIOR_PARIETAL  | INFERIOR_TI                  | right_INFERII                   | LATERAL_VIS                                   | THALAMUS                                                     |
| 33        | VENTROLATE            | SOMATOMO                         | INFERIOR_MARGINAL_SUI    | PARIETO_OC                   | INFERIOR_M                      | POSTERIOR_CEREBELLUM_VERMIS                   |                                                              |
| 34        | OCCIPITOTEN           | ANTERIOR_II                      | MEDIAL_VISUAL_NETWORK    | SOMATOMO                     | MEDIAL_VISI                     | LATERAL_VIS                                   | POSTERIOR_INSULA_ventral                                     |
| 35        | VISUAL_NET            | CEREBELLUM                       | right_INTRAPARIETAL_SUI  | left_INFERIO                 | right_INTRAF                    | POSTERIOR_CAUDATE_NUCLEUS                     |                                                              |
| 36        | CEREBELLUM            | POSTCENTR/                       | SUPERIOR_PARIETAL_LOB    | right_INTRAF                 | SUPERIOR_P                      | POSTERIOR_INFERIOR_MARGINAL_SULCUS            |                                                              |
| 37        | VENTRAL_M             | SOMATOMO                         | SUPERIOR_FRONTAL_GYR     | CEREBELLUM                   | SUPERIOR_F                      | POSTERIOR_POSTERIOR_VISUAL_NETWORK_medial     |                                                              |
| 38        | MIDDLE_FRC            | CAUDATE_NI                       | PRE_SUPPLEMENTARY_M      | SOMATOMO                     | PRE_SUPPLEI                     | left_INFERIO                                  | right_INFERIOR_PARIETAL_LOBULE                               |
| 39        | FRONTAL_EY            | INFERIOR_TI                      | LATERAL_VISUAL_NETWORKO  | DORSOMEDI                    | LATERAL_VIS                     | THALAMUS                                      | SUPERIOR_PARIETAL_LOBULE                                     |
| 40        | DORSOMEDI             | CEREBELLUM                       | PARIETO_OCCIPITAL_SULC   | CEREBELLUM                   | PARIETO_OC                      | CAUDATE_NI                                    | SUPERIOR_FRONTAL_GYRUS_anterior                              |
| 41        | THALAMUS              | VENTROLATE                       | DORSAL_VISUAL_STREAM     | THALAMUS                     | DORSAL_VISI                     | CEREBELLUM                                    | PRE_SUPPLEMENTARY_MOTOR_CORTEX                               |
| 42        | SOMATOMO              | left_INFERIO                     | SOMATOMOTOR_NETWORKO     | left_INFERIO                 | SOMATOMO                        | CEREBELLUM                                    | LATERAL_VISUAL_NETWORK_posterior                             |
| 43        | SOMATOMO              | PUTAMEN                          | FRONTAL_POLE_lateral     | PRECUNEUS                    | FRONTAL_PC                      | left_INFERIO                                  | PARIETO_OCCIPITAL_SULCUS                                     |
| 44        | DORSAL_VISI           | POSTERIOR_right_INFERIOR_FRONTAL | FUSIFORM_C               | right_INFERII                | INFERIOR_M                      | DORSAL_VISUAL_STREAM                          |                                                              |
| 45        | left_INTRAP/          | right_INFERII                    | MIDDLE_FRONTAL_GYRUS     | TEMPORAL_I                   | MIDDLE_FRC                      | SUPRAMARG                                     | SOMATOMOTOR_NETWORK_dorsolateral                             |
| 46        | LATERAL_VIS           | PRECUNEUS                        | DORSOMEDIAL_PREFRON      | MIDDLE_TEN                   | DORSOMEDI                       | FRONTAL_EY                                    | FRONTAL_POLE_lateral                                         |
| 47        | ORBITOFRONT           | left_INTRAP/                     | ANTERIOR_INSULA_dorsal   | POSTERIOR_                   | ANTERIOR_II                     | SUPERIOR_F                                    | right_INFERIOR_FRONTAL_SULCUS                                |
| 48        | CEREBELLUM            | POSTERIOR_VENTROLATERAL_PREFRO   | MIDDLE_TEN               | VENTROLATE                   | PARIETO_OC                      | MIDDLE_FRONTAL_GYRUS_anterior                 |                                                              |
| 49        | POSTERIOR_ORBITOFRONT | CEREBELLUM_IX                    | DORSOMEDI                | CEREBELLUM                   | DORSAL_VISI                     | DORSOMEDIAL_PREFRONTAL_CORTEX_anterior        |                                                              |
| 50        | CAUDATE_NI            | POSTERIOR_PERIGENUAL             | ANTERIOR_II              | PERIGENUAL                   | right_INFERII                   | ANTERIOR_INSULA_dorsal                        |                                                              |
| 51        | CEREBELLUM            | CEREBELLUM                       | POSTCENTRAL_SULCUS       | ORBITOFRONT                  | POSTCENTR/                      | right_INTRAF                                  | VENTROLATERAL_PREFRONTAL_CORTEX                              |
| 52        | POSTERIOR_SUPERIOR_P  | AUDITORY_NETWORK                 | right_INFERII            | AUDITORY_h                   | CEREBELLUM                      | right_INTRAPARIETAL_SULCUS_and_PARS_ORBITALIS |                                                              |
| 53        | FRONTAL_PC            | PRE_SUPPLEI                      | SOMATOMOTOR_NETWORKO     | SUPERIOR_F                   | SOMATOMO                        | POSTCENTR/                                    | CEREBELLUM_IX                                                |
| 54        | CAUDATE_NI            | CEREBELLUM                       | CEREBELLUM_CRUSII_left   | POSTERIOR_CEREBELLUM         | AUDITORY_h                      | POSTCENTRAL_SULCUS                            |                                                              |
| 55        | FUSIFORM_C            | CAUDATE_NI                       | POSTERIOR_VISUAL_NETV    | VENTRAL_M                    | POSTERIOR_CEREBELLUM            | SOMATOMOTOR_NETWORK_medial                    |                                                              |
| 56        | SUPERIOR_F            | CEREBELLUM                       | VENTRAL_MEDIAL_PREFRI    | CEREBELLUM                   | VENTRAL_M                       | FUSIFORM_C                                    | CEREBELLUM_CRUSII_left                                       |
| 57        | CEREBELLUM            | DORSOMEDI                        | ORBITOFRONTAL_CORTEX     | MEDIAL_VISI                  | ORBITOFRONT                     | right_MIDDLI                                  | VENTRAL_MEDIAL_PREFRONTAL_CORTEX                             |
| 58        | MEDIAL_VISI           | left_INFERIO                     | FUSIFORM_GYRUS_latera    | POSTERIOR_FUSIFORM_C         | PRECUNEUS                       | right_MIDDLE_FRONTAL_GYRUS_posterior          |                                                              |
| 59        | left_INFERIO          | CEREBELLUM                       | right_MIDDLE_FRONTAL_C   | CAUDATE_NI                   | right_MIDDLI                    | MEDIAL_VISI                                   | PRECUNEUS_dorsal                                             |
| 60        | right_MIDDLI          | FUSIFORM_C                       | LATERAL_VISUAL_NETWORKO  | right_INFERII                | LATERAL_VISI                    | left_INTRAP/                                  | ANTERIOR_INSULA_ventral_and_PERI_INSULAR_SULCUS              |
| 61        | LATERAL_VIS           | right_MIDDLI                     | PRECUNEUS_dorsal         | PRE_SUPPLEI                  | PRECUNEUS                       | right_INFERII                                 | MEDIAL_VISUAL_NETWORK_anterior                               |
| 62        | POSTERIOR_POSTERIOR_  | ANTERIOR_INSULA_ventra           | CEREBELLUM               | ANTERIOR_II                  | OCCIPITOTEN                     | PERIGENUAL                                    | ANTERIOR_CINGULATE_CORTEX                                    |
| 63        | CEREBELLUM            | FRONTAL_EY                       | MEDIAL_VISUAL_NETWORKO   | CEREBELLUM                   | MEDIAL_VISI                     | VISUAL_NET                                    | left_INTRAPARIETAL_SULCUS_and_MIDDLE_FRONTAL_GYRUS_posterior |
| 64        | CEREBELLUM            | MEDIAL_VISI                      | PUTAMEN                  | POSTERIOR_PUTAMEN            | PUTAMEN                         | PUTAMEN                                       | PUTAMEN                                                      |

Table S1.9 Region name and abbreviation legend

| ROI_label_64    | ROI_full_name_64                                   | Networks_12                                              |
|-----------------|----------------------------------------------------|----------------------------------------------------------|
| PUT             | PUTAMEN                                            | BASAL_GANGLIA_and_THALAMUS                               |
| PINS_v          | POSTERIOR_INSULA_ventral                           | AUDITORY_NETWORK_and_POSTERIOR_INSULA                    |
| CERVM           | CEREBELLUM_VERMIS                                  | MESOLIMBIC_NETWORK                                       |
| THAL            | THALAMUS                                           | BASAL_GANGLIA_and_THALAMUS                               |
| CER7ab          | CEREBELLUM_VIlab                                   | CEREBELLUM                                               |
| CER5            | CEREBELLUM_I-V                                     | CEREBELLUM                                               |
| ACor_d          | ANTERIOR_CINGULATE_CORTEX_dorsal                   | VENTRAL_ATTENTION_NETWORK_and_SALIENCE_NETWORK           |
| CAUDNH_NACC     | CAUDATE_NUCLEUS_HEAD_and_NUCLEUS_ACCUMBENS         | MESOLIMBIC_NETWORK                                       |
| TP              | TEMPORAL_POLE                                      | MESOLIMBIC_NETWORK                                       |
| DMPFcor_p       | DORSOMEDIAL_PREFRONTAL_CORTEX                      | VENTRAL_ATTENTION_NETWORK_and_SALIENCE_NETWORK           |
| R_CERCER2       | CEREBELLUM_CRUSII_right                            | CEREBELLUM                                               |
| CERCER1         | CEREBELLUM_CRUSI                                   | CEREBELLUM                                               |
| L_IFsul         | left_INFERIOR_FRONTAL_SULCUS                       | FRONTO_PARIETAL_NETWORK                                  |
| MOTnet_vl       | SOMATOMOTOR_NETWORK_ventrolateral                  | SOMATOMOTOR_NETWORK                                      |
| CER7b           | CEREBELLUM_VIib                                    | CEREBELLUM                                               |
| FUSgyr_m        | FUSIFORM_GYRUS_medial                              | VENTRAL_VISUAL_STREAM_and_DORSAL_VISUAL_STREAM           |
| CAUDN           | CAUDATE_NUCLEUS                                    | BASAL_GANGLIA_and_THALAMUS                               |
| PINS_d          | POSTERIOR_INSULA_dorsal                            | AUDITORY_NETWORK_and_POSTERIOR_INSULA                    |
| PCor_PRC        | POSTERIOR_CINGULATE_CORTEX_and_LOBULE              | DEFAULT_MODE_NETWORK_posteromedial                       |
| L_IPlob         | left_INFERIOR_PARIETAL_LOBULE                      | DEFAULT_MODE_NETWORK_anteromedial_and_left_ANGULAR_GYRUS |
| PCor_d          | POSTERIOR_CINGULATE_CORTEX_dorsal                  | VENTRAL_ATTENTION_NETWORK_and_SALIENCE_NETWORK           |
| ITgyr           | INFERIOR_TEMPORAL_GYRUS                            | MESOLIMBIC_NETWORK                                       |
| SMgyr           | SUPRAMARGINAL_GYRUS                                | VENTRAL_ATTENTION_NETWORK_and_SALIENCE_NETWORK           |
| MTgyr_a         | MIDDLE_TEMPORAL_GYRUS_anterior                     | DEFAULT_MODE_NETWORK_lateral                             |
| AMY_HIPP        | AMYGDALA_and_HIPPOCAMPUS                           | MESOLIMBIC_NETWORK                                       |
| FEF             | FRONTAL_EYE_FIELD                                  | VENTRAL_ATTENTION_NETWORK_and_SALIENCE_NETWORK           |
| VISnet_md       | VISUAL_NETWORK_mediodorsal                         | VISUAL_NETWORK                                           |
| OCCTgyr_l       | OCCIPITOTEMPORAL_GYRUS_lateral                     | VENTRAL_VISUAL_STREAM_and_DORSAL_VISUAL_STREAM           |
| CER6            | CEREBELLUM_VI                                      | CEREBELLUM                                               |
| PVISnet_m       | POSTERIOR_VISUAL_NETWORK_medial                    | VISUAL_NETWORK                                           |
| R_IPlob         | right_INFERIOR_PARIETAL_LOBULE                     | FRONTO_PARIETAL_NETWORK                                  |
| IMSul           | INFERIOR_MARGINAL_SULCUS                           | VENTRAL_ATTENTION_NETWORK_and_SALIENCE_NETWORK           |
| MVISnet_p       | MEDIAL_VISUAL_NETWORK_posterior                    | VISUAL_NETWORK                                           |
| PGACcor         | PERIGENUAL_ANTERIOR_CINGULATE_CORTEX               | DEFAULT_MODE_NETWORK_anteromedial_and_left_ANGULAR_GYRUS |
| MVISnet_a       | MEDIAL_VISUAL_NETWORK_anterior                     | VISUAL_NETWORK                                           |
| AINS_v_Psul     | ANTERIOR_INSULA_ventral_and_PERIINSULA             | MESOLIMBIC_NETWORK                                       |
| PRC_d           | PRECUNEUS_dorsal                                   | VENTRAL_VISUAL_STREAM_and_DORSAL_VISUAL_STREAM           |
| LVISnet_a       | LATERAL_VISUAL_NETWORK_anterior                    | VISUAL_NETWORK                                           |
| R_MFgyr_p       | right_MIDDLE_FRONTAL_GYRUS_posterior               | FRONTO_PARIETAL_NETWORK                                  |
| FUSgyr_l        | FUSIFORM_GYRUS_lateral                             | VENTRAL_VISUAL_STREAM_and_DORSAL_VISUAL_STREAM           |
| ORBcor          | ORBITOFRONTAL_CORTEX                               | MESOLIMBIC_NETWORK                                       |
| VMPFcor         | VENTRAL_MEDIAL_PREFRONTAL_CORTEX                   | DEFAULT_MODE_NETWORK_anteromedial_and_left_ANGULAR_GYRUS |
| PVISnet_l       | POSTERIOR_VISUAL_NETWORK_lateral                   | VISUAL_NETWORK                                           |
| L_CERCER2       | CEREBELLUM_CRUSII_left                             | CEREBELLUM                                               |
| MOTnet_m        | SOMATOMOTOR_NETWORK_medial                         | SOMATOMOTOR_NETWORK                                      |
| AUDnet          | AUDITORY_NETWORK                                   | AUDITORY_NETWORK_and_POSTERIOR_INSULA                    |
| PCsul           | POSTCENTRAL_SULCUS                                 | VENTRAL_ATTENTION_NETWORK_and_SALIENCE_NETWORK           |
| CER9            | CEREBELLUM_IX                                      | CEREBELLUM                                               |
| R_IPsul_PORB    | right_INTRAPARIETAL_SULCUS_and_PARIETAL_POLE       | FRONTO_PARIETAL_NETWORK                                  |
| VLPFcor         | VENTROLATERAL_PREFRONTAL_CORTEX                    | DEFAULT_MODE_NETWORK_lateral                             |
| AINS_d          | ANTERIOR_INSULA_dorsal                             | VENTRAL_ATTENTION_NETWORK_and_SALIENCE_NETWORK           |
| DMPFcor_a       | DORSOMEDIAL_PREFRONTAL_CORTEX                      | DEFAULT_MODE_NETWORK_anteromedial_and_left_ANGULAR_GYRUS |
| MFgyr_a         | MIDDLE_FRONTAL_GYRUS_anterior                      | VENTRAL_ATTENTION_NETWORK_and_SALIENCE_NETWORK           |
| R_IFsul         | right_INFERIOR_FRONTAL_SULCUS                      | FRONTO_PARIETAL_NETWORK                                  |
| FP_l            | FRONTAL_POLE_lateral                               | FRONTO_PARIETAL_NETWORK                                  |
| MOTnet_dl       | SOMATOMOTOR_NETWORK_dorsolateral                   | SOMATOMOTOR_NETWORK                                      |
| DVIS            | DORSAL_VISUAL_STREAM                               | VENTRAL_VISUAL_STREAM_and_DORSAL_VISUAL_STREAM           |
| POSul           | PARIETO_OCCIPITAL_SULCUS                           | DEFAULT_MODE_NETWORK_posteromedial                       |
| LVISnet_p       | LATERAL_VISUAL_NETWORK_posterior                   | VISUAL_NETWORK                                           |
| SMOTcor         | PRE_SUPPLEMENTARY_MOTOR_CORTEX                     | VENTRAL_ATTENTION_NETWORK_and_SALIENCE_NETWORK           |
| L_SFgyr_a       | left_SUPERIOR_FRONTAL_GYRUS_anterior               | DEFAULT_MODE_NETWORK_anteromedial_and_left_ANGULAR_GYRUS |
| SPlob           | SUPERIOR_PARIETAL_LOBULE                           | SOMATOMOTOR_NETWORK                                      |
| L_IPsul_MFgyr_p | left_INTRAPARIETAL_SULCUS_and_MIDDLE_FRONTAL_GYRUS | FRONTO_PARIETAL_NETWORK                                  |
| MTgyr_p         | MIDDLE_TEMPORAL_GYRUS_posterior                    | DEFAULT_MODE_NETWORK_lateral                             |

**Table S2.1** Difference in individual similarity with 16p11.2 deletion FC-signature in individuals with idiopathic autism and controls

| U     | p_value | median_Autism | median_Control | rank_biserial_correlation | q_value | node_name                                              |
|-------|---------|---------------|----------------|---------------------------|---------|--------------------------------------------------------|
| 20996 | 0,0002  | 0,0525        | -0,0282        |                           | 0,2024  | 0,0113 putamen                                         |
| 24917 | 0,3218  | 0,0101        | 0,0058         |                           | 0,0535  | 0,6181 post. insula v.                                 |
| 25832 | 0,7288  | 0,0153        | 0,0139         |                           | 0,0187  | 0,8651 cereb vermis                                    |
| 21996 | 0,0023  | 0,0436        | -0,0217        |                           | 0,1644  | 0,0296 thalamus                                        |
| 24376 | 0,1702  | -0,0052       | 0,0007         |                           | -0,0740 | 0,4539 cereb viiiab                                    |
| 25737 | 0,6792  | 0,0129        | 0,0293         |                           | -0,0223 | 0,8523 cereb i-v                                       |
| 23807 | 0,0764  | 0,0250        | -0,0164        |                           | 0,0957  | 0,2716 ant. cingulate ctx d.                           |
| 26219 | 0,9408  | 0,0082        | -0,0119        |                           | -0,0040 | 0,9408 caudate nucleus head, nucleus accumbens         |
| 25237 | 0,4440  | -0,0079       | -0,0095        |                           | -0,0413 | 0,6608 temporal pole                                   |
| 25955 | 0,7948  | 0,0127        | 0,0007         |                           | -0,0141 | 0,8678 dorsomedial PFC ctx post.                       |
| 24251 | 0,1444  | 0,0345        | -0,0294        |                           | 0,0788  | 0,4401 cereb crus-II R                                 |
| 26005 | 0,8221  | -0,0095       | -0,0060        |                           | 0,0122  | 0,8678 cereb crus-I                                    |
| 24810 | 0,2864  | -0,0285       | 0,0114         |                           | -0,0575 | 0,6181 L inf. frontal sulcus                           |
| 21795 | 0,0014  | 0,0514        | 0,0141         |                           | 0,1721  | 0,0229 somatomot. net. ventrolat.                      |
| 23945 | 0,0939  | -0,0234       | 0,0323         |                           | -0,0904 | 0,3165 cereb viib                                      |
| 24780 | 0,2770  | -0,0051       | 0,0049         |                           | 0,0587  | 0,6181 fusiform gyr. medial                            |
| 21248 | 0,0004  | 0,0615        | -0,0522        |                           | 0,1929  | 0,0113 caudate nucleus                                 |
| 23267 | 0,0314  | 0,0374        | -0,0041        |                           | 0,1162  | 0,1826 post. insula d.                                 |
| 25135 | 0,4024  | -0,0143       | -0,0019        |                           | -0,0452 | 0,6439 post. cingulate ctx, precuneus                  |
| 26138 | 0,8956  | 0,0053        | -0,0053        |                           | 0,0071  | 0,9098 L inf. parietal lobule                          |
| 23562 | 0,0518  | 0,0164        | -0,0130        |                           | 0,1050  | 0,2073 post. cingulate ctx d.                          |
| 23348 | 0,0362  | -0,0430       | 0,0134         |                           | -0,1131 | 0,1897 inf. temporal gyr.                              |
| 25408 | 0,5188  | 0,0014        | 0,0053         |                           | -0,0348 | 0,6973 supramarginal gyr.                              |
| 24849 | 0,2990  | 0,0021        | -0,0088        |                           | 0,0561  | 0,6181 mid. temporal gyr. ant.                         |
| 25889 | 0,7592  | -0,0044       | 0,0241         |                           | -0,0166 | 0,8676 amygdala, hippocampus                           |
| 23685 | 0,0632  | -0,0089       | 0,0194         |                           | -0,1003 | 0,2378 frontal eye field                               |
| 25387 | 0,5093  | -0,0043       | 0,0235         |                           | -0,0356 | 0,6973 visual net. mediod.                             |
| 24318 | 0,1578  | -0,0182       | -0,0174        |                           | -0,0762 | 0,4539 occipitotemporal gyr. lat.                      |
| 25196 | 0,4270  | -0,0031       | -0,0096        |                           | 0,0429  | 0,6608 cereb vi                                        |
| 25485 | 0,5546  | -0,0010       | 0,0008         |                           | -0,0319 | 0,7243 post. visual net. medial                        |
| 23500 | 0,0468  | 0,0283        | -0,0068        |                           | 0,1073  | 0,1996 R inf. parietal lobule                          |
| 25071 | 0,3776  | -0,0062       | 0,0131         |                           | -0,0476 | 0,6359 inf. marginal sulcus                            |
| 25881 | 0,7549  | -0,0104       | -0,0034        |                           | -0,0169 | 0,8676 medial visual net. post.                        |
| 22107 | 0,0030  | 0,0817        | -0,0241        |                           | 0,1602  | 0,0319 perigenual ant. cingulate ctx                   |
| 25417 | 0,5230  | 0,0047        | 0,0055         |                           | 0,0345  | 0,6973 medial visual net. ant.                         |
| 24765 | 0,2723  | -0,0192       | 0,0118         |                           | -0,0593 | 0,6181 ant. insula v., peri insular sulcus             |
| 25974 | 0,8051  | 0,0048        | 0,0052         |                           | -0,0133 | 0,8678 precuneus d.                                    |
| 25051 | 0,3700  | 0,0221        | 0,0032         |                           | 0,0484  | 0,6359 lat. visual net. ant.                           |
| 25232 | 0,4419  | 0,0005        | -0,0299        |                           | 0,0415  | 0,6608 R mid. frontal gyr. post.                       |
| 26039 | 0,8407  | 0,0035        | 0,0168         |                           | -0,0109 | 0,8678 fusiform gyr. lat.                              |
| 23477 | 0,0450  | -0,0187       | 0,0300         |                           | -0,1082 | 0,1996 orbitofrontal ctx                               |
| 25100 | 0,3887  | -0,0047       | -0,0025        |                           | -0,0465 | 0,6379 v. medial PFC ctx                               |
| 24584 | 0,2205  | -0,0161       | 0,0385         |                           | -0,0661 | 0,5645 post. visual net. lat.                          |
| 25373 | 0,5030  | 0,0248        | 0,0056         |                           | 0,0362  | 0,6973 cereb crus-II L                                 |
| 23385 | 0,0385  | 0,0707        | 0,0534         |                           | 0,1117  | 0,1897 somatomot. net. medial                          |
| 22855 | 0,0146  | 0,0645        | 0,0016         |                           | 0,1318  | 0,1168 auditory net.                                   |
| 25773 | 0,6979  | 0,0154        | 0,0404         |                           | 0,0210  | 0,8589 postcentral sulcus                              |
| 26012 | 0,8259  | 0,0027        | 0,0010         |                           | 0,0119  | 0,8678 cereb ix                                        |
| 22978 | 0,0185  | 0,0163        | -0,0239        |                           | 0,1271  | 0,1186 R intraparietal sulcus, pars orbitalis          |
| 25834 | 0,7299  | 0,0228        | 0,0031         |                           | 0,0187  | 0,8651 ventrolat. PFC ctx                              |
| 21511 | 0,0007  | 0,0278        | -0,0397        |                           | 0,1829  | 0,0150 ant. insula d.                                  |
| 22701 | 0,0108  | 0,0292        | -0,0367        |                           | 0,1377  | 0,0983 dorsomedial PFC ctx ant.                        |
| 24936 | 0,3284  | 0,0053        | 0,0062         |                           | 0,0528  | 0,6181 mid. frontal gyr. ant.                          |
| 22979 | 0,0185  | -0,0435       | 0,0348         |                           | -0,1271 | 0,1186 R inf. frontal sulcus                           |
| 25058 | 0,3727  | -0,0122       | 0,0192         |                           | -0,0481 | 0,6359 frontal pole lat.                               |
| 24088 | 0,1154  | 0,0723        | 0,0464         |                           | 0,0850  | 0,3694 somatomot. net. dorsolat.                       |
| 25676 | 0,6480  | 0,0034        | 0,0393         |                           | -0,0247 | 0,8295 d. visual stream                                |
| 24357 | 0,1661  | -0,0376       | 0,0116         |                           | -0,0748 | 0,4539 parieto occipital sulcus                        |
| 25338 | 0,4874  | 0,0050        | 0,0411         |                           | -0,0375 | 0,6973 lat. visual net. post.                          |
| 24993 | 0,3486  | -0,0309       | 0,0119         |                           | -0,0506 | 0,6359 presupplementary mot. ctx                       |
| 24886 | 0,3113  | 0,0118        | -0,0244        |                           | 0,0547  | 0,6181 sup. frontal gyr. ant.                          |
| 26032 | 0,8369  | 0,0155        | 0,0257         |                           | 0,0111  | 0,8678 sup. parietal lobule                            |
| 24907 | 0,3184  | 0,0081        | 0,0458         |                           | -0,0539 | 0,6181 L intraparietal sulcus, mid. frontal gyr. post. |
| 24741 | 0,2650  | 0,0113        | -0,0196        |                           | 0,0602  | 0,6181 mid. temporal gyr. post.                        |

**Table S2.2** Difference in individual similarity with 22q11.2 deletion FC-signature in individuals with idiopathic autism and controls

| U     | p_value | median_Autism | median_Control | rank_biserial_correlation | q_value | node_name                                              |
|-------|---------|---------------|----------------|---------------------------|---------|--------------------------------------------------------|
| 22959 | 0,0178  | 0,0758        | 0,0013         |                           | 0,1279  | 0,0951 putamen                                         |
| 25558 | 0,5895  | 0,0005        | 0,0092         |                           | -0,0291 | 0,7398 post. insula v.                                 |
| 25730 | 0,6756  | -0,0089       | 0,0203         |                           | -0,0226 | 0,8007 cereb vermis                                    |
| 21878 | 0,0017  | 0,0936        | -0,0005        |                           | 0,1689  | 0,0191 thalamus                                        |
| 23794 | 0,0749  | 0,0350        | -0,0174        |                           | 0,0961  | 0,2109 cereb viiiab                                    |
| 25871 | 0,7496  | -0,0052       | -0,0036        |                           | 0,0172  | 0,8241 cereb i-v                                       |
| 25082 | 0,3818  | 0,0112        | -0,0059        |                           | 0,0472  | 0,4987 ant. cingulate ctx d.                           |
| 24302 | 0,1545  | 0,0327        | -0,0105        |                           | 0,0768  | 0,3191 caudate nucleus head, nucleus accumbens         |
| 20323 | 0,0000  | 0,0359        | -0,0595        |                           | 0,2280  | 0,0012 temporal pole                                   |
| 25631 | 0,6254  | 0,0033        | -0,0125        |                           | 0,0264  | 0,7698 dorsomedial PFC ctx post.                       |
| 23403 | 0,0397  | 0,0268        | -0,0261        |                           | 0,1110  | 0,1590 cereb crus-II R                                 |
| 24576 | 0,2184  | 0,0071        | -0,0160        |                           | 0,0664  | 0,3667 cereb crus-I                                    |
| 25857 | 0,7421  | -0,0296       | 0,0033         |                           | -0,0178 | 0,8241 L inf. frontal sulcus                           |
| 23047 | 0,0211  | 0,0505        | 0,0001         |                           | 0,1245  | 0,1036 somatomot. net. ventrolat.                      |
| 24595 | 0,2235  | 0,0058        | -0,0168        |                           | 0,0657  | 0,3667 cereb viib                                      |
| 24864 | 0,3039  | -0,0327       | -0,0030        |                           | -0,0555 | 0,4562 fusiform gyr. medial                            |
| 26254 | 0,9604  | 0,0212        | 0,0221         |                           | 0,0027  | 0,9757 caudate nucleus                                 |
| 24162 | 0,1280  | 0,0094        | -0,0375        |                           | 0,0822  | 0,2925 post. insula d.                                 |
| 21384 | 0,0005  | 0,0338        | -0,0312        |                           | 0,1877  | 0,0081 post. cingulate ctx, precuneus                  |
| 25805 | 0,7146  | -0,0152       | 0,0154         |                           | -0,0198 | 0,8167 L inf. parietal lobule                          |
| 22697 | 0,0107  | 0,0276        | -0,0239        |                           | 0,1378  | 0,0759 post. cingulate ctx d.                          |
| 24806 | 0,2851  | -0,0064       | -0,0072        |                           | 0,0577  | 0,4451 inf. temporal gyr.                              |
| 26321 | 0,9980  | -0,0094       | 0,0079         |                           | -0,0002 | 0,9980 supramarginal gyr.                              |
| 24209 | 0,1365  | 0,0231        | -0,0177        |                           | 0,0804  | 0,3012 mid. temporal gyr. ant.                         |
| 23802 | 0,0758  | 0,0235        | -0,0129        |                           | 0,0958  | 0,2109 amygdala, hippocampus                           |
| 25779 | 0,7010  | 0,0008        | -0,0002        |                           | -0,0207 | 0,8157 frontal eye field                               |
| 24339 | 0,1622  | -0,0282       | 0,0478         |                           | -0,0754 | 0,3208 visual net. mediod.                             |
| 23870 | 0,0840  | 0,0243        | 0,0035         |                           | 0,0933  | 0,2151 occipitotemporal gyr. lat.                      |
| 22806 | 0,0133  | 0,0221        | -0,0021        |                           | 0,1337  | 0,0793 cereb vi                                        |
| 25672 | 0,6460  | 0,0076        | 0,0090         |                           | 0,0248  | 0,7801 post. visual net. medial                        |
| 24437 | 0,1840  | 0,0190        | 0,0044         |                           | 0,0717  | 0,3364 R inf. parietal lobule                          |
| 24767 | 0,2729  | -0,0090       | 0,0126         |                           | -0,0592 | 0,4367 inf. marginal sulcus                            |
| 24142 | 0,1245  | -0,0301       | 0,0215         |                           | -0,0829 | 0,2925 medial visual net. post.                        |
| 20477 | 0,0000  | 0,0524        | -0,0418        |                           | 0,2221  | 0,0012 perigenual ant. cingulate ctx                   |
| 26067 | 0,8562  | -0,0069       | -0,0025        |                           | -0,0098 | 0,8983 medial visual net. ant.                         |
| 24469 | 0,1915  | 0,0224        | -0,0173        |                           | 0,0705  | 0,3405 ant. insula v., peri insular sulcus             |
| 24912 | 0,3201  | 0,0039        | 0,0152         |                           | -0,0537 | 0,4562 precuneus d.                                    |
| 24501 | 0,1993  | -0,0093       | 0,0181         |                           | -0,0693 | 0,3447 lat. visual net. ant.                           |
| 23862 | 0,0830  | 0,0074        | -0,0231        |                           | 0,0936  | 0,2151 R mid. frontal gyr. post.                       |
| 25890 | 0,7597  | -0,0065       | 0,0082         |                           | -0,0165 | 0,8241 fusiform gyr. lat.                              |
| 22552 | 0,0079  | 0,0401        | -0,0158        |                           | 0,1433  | 0,0677 orbitofrontal ctx                               |
| 21360 | 0,0005  | 0,0215        | -0,0499        |                           | 0,1886  | 0,0081 v. medial PFC ctx                               |
| 24884 | 0,3106  | -0,0229       | 0,0131         |                           | -0,0547 | 0,4562 post. visual net. lat.                          |
| 21889 | 0,0018  | 0,0566        | -0,0294        |                           | 0,1685  | 0,0191 cereb crus-II L                                 |
| 23384 | 0,0385  | 0,0572        | -0,0063        |                           | 0,1117  | 0,1590 somatomot. net. medial                          |
| 23523 | 0,0486  | 0,0248        | 0,0177         |                           | 0,1064  | 0,1816 auditory net.                                   |
| 23391 | 0,0389  | 0,0425        | -0,0021        |                           | 0,1115  | 0,1590 postcentral sulcus                              |
| 23746 | 0,0695  | 0,0394        | -0,0135        |                           | 0,0980  | 0,2109 cereb ix                                        |
| 24377 | 0,1704  | 0,0077        | -0,0155        |                           | 0,0740  | 0,3208 R intraparietal sulcus, pars orbitalis          |
| 24373 | 0,1695  | 0,0198        | -0,0171        |                           | 0,0742  | 0,3208 ventrolat. PFC ctx                              |
| 24914 | 0,3208  | 0,0065        | -0,0007        |                           | 0,0536  | 0,4562 ant. insula d.                                  |
| 23749 | 0,0698  | 0,0139        | -0,0235        |                           | 0,0979  | 0,2109 dorsomedial PFC ctx ant.                        |
| 22584 | 0,0085  | 0,0339        | -0,0456        |                           | 0,1421  | 0,0677 mid. frontal gyr. ant.                          |
| 22820 | 0,0136  | -0,0395       | 0,0281         |                           | -0,1331 | 0,0793 R inf. frontal sulcus                           |
| 23553 | 0,0511  | 0,0172        | -0,0074        |                           | 0,1053  | 0,1816 frontal pole lat.                               |
| 23762 | 0,0713  | 0,0406        | 0,0076         |                           | 0,0974  | 0,2109 somatomot. net. dorsolat.                       |
| 23951 | 0,0948  | -0,0340       | 0,0192         |                           | -0,0902 | 0,2333 d. visual stream                                |
| 25034 | 0,3637  | 0,0097        | -0,0084        |                           | 0,0490  | 0,4987 parieto occipital sulcus                        |
| 25080 | 0,3810  | 0,0117        | -0,0280        |                           | 0,0473  | 0,4987 lat. visual net. post.                          |
| 26042 | 0,8424  | -0,0243       | -0,0056        |                           | 0,0108  | 0,8983 presupplementary mot. ctx                       |
| 24244 | 0,1431  | 0,0197        | -0,0087        |                           | 0,0791  | 0,3052 sup. frontal gyr. ant.                          |
| 26126 | 0,8889  | 0,0263        | 0,0300         |                           | -0,0076 | 0,9176 sup. parietal lobule                            |
| 25069 | 0,3768  | 0,0057        | -0,0044        |                           | 0,0477  | 0,4987 L intraparietal sulcus, mid. frontal gyr. post. |
| 25265 | 0,4558  | 0,0080        | 0,0060         |                           | 0,0403  | 0,5834 mid. temporal gyr. post.                        |

**Table S2.3** Difference in individual similarity with 16p11.2 deletion FC-signature in individuals with idiopathic schizophrenia and controls

| U     | p_value | median_SZ | median_Control | rank_biserial_correlation | q_value | node_name                                              |
|-------|---------|-----------|----------------|---------------------------|---------|--------------------------------------------------------|
| 25036 | 0,0058  | 0,0163    | -0,0212        |                           | 0,1450  | 0,0180 putamen                                         |
| 23452 | 0,0002  | 0,0554    | -0,0335        |                           | 0,1991  | 0,0008 post. insula v.                                 |
| 28680 | 0,6958  | 0,0089    | -0,0093        |                           | 0,0206  | 0,7300 cereb vermis                                    |
| 21892 | 0,0000  | 0,0584    | -0,0396        |                           | 0,2524  | 0,0000 thalamus                                        |
| 25991 | 0,0325  | 0,0232    | -0,0178        |                           | 0,1124  | 0,0716 cereb viiiab                                    |
| 26994 | 0,1371  | 0,0188    | -0,0278        |                           | 0,0781  | 0,2249 cereb i-v                                       |
| 23022 | 0,0000  | 0,0723    | -0,0595        |                           | 0,2138  | 0,0003 ant. cingulate ctx d.                           |
| 25444 | 0,0126  | 0,0213    | -0,0363        |                           | 0,1311  | 0,0323 caudate nucleus head, nucleus accumbens         |
| 27860 | 0,3555  | -0,0076   | -0,0477        |                           | 0,0486  | 0,4551 temporal pole                                   |
| 26342 | 0,0561  | 0,0284    | -0,0394        |                           | 0,1004  | 0,1123 dorsomedial PFC ctx post.                       |
| 26769 | 0,1024  | 0,0135    | -0,0045        |                           | 0,0858  | 0,1772 cereb crus-II R                                 |
| 22133 | 0,0000  | 0,0436    | -0,0396        |                           | 0,2441  | 0,0000 cereb crus-I                                    |
| 27243 | 0,1852  | -0,0082   | -0,0185        |                           | 0,0696  | 0,2811 L inf. frontal sulcus                           |
| 20238 | 0,0000  | 0,1119    | -0,0381        |                           | 0,3089  | 0,0000 somatomot. net. ventrolat.                      |
| 28391 | 0,5627  | 0,0174    | 0,0011         |                           | 0,0304  | 0,6209 cereb viib                                      |
| 28076 | 0,4333  | 0,0060    | -0,0064        |                           | 0,0412  | 0,5118 fusiform gyr. medial                            |
| 25045 | 0,0059  | 0,0472    | -0,0327        |                           | 0,1447  | 0,0180 caudate nucleus                                 |
| 19196 | 0,0000  | 0,0863    | -0,0483        |                           | 0,3444  | 0,0000 post. insula d.                                 |
| 23113 | 0,0001  | 0,0271    | -0,0521        |                           | 0,2107  | 0,0004 post. cingulate ctx, precuneus                  |
| 27042 | 0,1455  | 0,0047    | -0,0301        |                           | 0,0765  | 0,2328 L inf. parietal lobule                          |
| 24425 | 0,0016  | 0,0254    | -0,0457        |                           | 0,1659  | 0,0064 post. cingulate ctx d.                          |
| 25692 | 0,0196  | 0,0185    | -0,0500        |                           | 0,1226  | 0,0466 inf. temporal gyr.                              |
| 24852 | 0,0040  | 0,0548    | -0,0433        |                           | 0,1513  | 0,0142 supramarginal gyr.                              |
| 24776 | 0,0034  | 0,0174    | -0,0401        |                           | 0,1539  | 0,0128 mid. temporal gyr. ant.                         |
| 24960 | 0,0050  | 0,0334    | -0,0502        |                           | 0,1476  | 0,0167 amygdala, hippocampus                           |
| 25150 | 0,0072  | 0,0122    | -0,0429        |                           | 0,1411  | 0,0211 frontal eye field                               |
| 28183 | 0,4752  | 0,0072    | -0,0136        |                           | 0,0375  | 0,5431 visual net. mediod.                             |
| 27724 | 0,3114  | 0,0074    | -0,0150        |                           | 0,0532  | 0,4152 occipitotemporal gyr. lat.                      |
| 25714 | 0,0204  | 0,0237    | -0,0118        |                           | 0,1218  | 0,0466 cereb vi                                        |
| 28427 | 0,5786  | 0,0006    | -0,0308        |                           | 0,0292  | 0,6276 post. visual net. medial                        |
| 28222 | 0,4910  | 0,0075    | -0,0213        |                           | 0,0362  | 0,5513 R inf. parietal lobule                          |
| 28615 | 0,6649  | -0,0126   | -0,0071        |                           | 0,0228  | 0,7092 inf. marginal sulcus                            |
| 26604 | 0,0818  | 0,0145    | -0,0128        |                           | 0,0915  | 0,1496 medial visual net. post.                        |
| 27697 | 0,3031  | -0,0241   | 0,0007         |                           | -0,0541 | 0,4127 perigenual ant. cingulate ctx                   |
| 29195 | 0,9552  | 0,0203    | 0,0303         |                           | 0,0030  | 0,9552 medial visual net. ant.                         |
| 22755 | 0,0000  | 0,0464    | -0,0618        |                           | 0,2229  | 0,0002 ant. insula v., peri insular sulcus             |
| 28031 | 0,4163  | -0,0097   | 0,0218         |                           | -0,0427 | 0,5118 precuneus d.                                    |
| 27756 | 0,3214  | -0,0043   | 0,0385         |                           | -0,0521 | 0,4198 lat. visual net. ant.                           |
| 27911 | 0,3730  | 0,0177    | -0,0170        |                           | 0,0468  | 0,4681 R mid. frontal gyr. post.                       |
| 27159 | 0,1677  | 0,0368    | 0,0055         |                           | 0,0725  | 0,2618 fusiform gyr. lat.                              |
| 26343 | 0,0561  | 0,0227    | -0,0304        |                           | 0,1004  | 0,1123 orbitofrontal ctx                               |
| 22036 | 0,0000  | 0,0505    | -0,0531        |                           | 0,2475  | 0,0000 v. medial PFC ctx                               |
| 27677 | 0,2970  | -0,0065   | 0,0185         |                           | -0,0548 | 0,4127 post. visual net. lat.                          |
| 25407 | 0,0118  | 0,0326    | -0,0310        |                           | 0,1323  | 0,0314 cereb crus-II L                                 |
| 24268 | 0,0011  | 0,0730    | -0,0056        |                           | 0,1712  | 0,0048 somatomot. net. medial                          |
| 20523 | 0,0000  | 0,0738    | -0,0632        |                           | 0,2991  | 0,0000 auditory net.                                   |
| 22810 | 0,0000  | 0,0682    | -0,0325        |                           | 0,2210  | 0,0002 postcentral sulcus                              |
| 25628 | 0,0176  | 0,0278    | -0,0136        |                           | 0,1248  | 0,0432 cereb ix                                        |
| 28093 | 0,4398  | 0,0346    | -0,0130        |                           | 0,0406  | 0,5118 R intraparietal sulcus, pars orbitalis          |
| 26136 | 0,0409  | 0,0089    | 0,0393         |                           | -0,1074 | 0,0873 ventrolat. PFC ctx                              |
| 22299 | 0,0000  | 0,0685    | -0,0367        |                           | 0,2385  | 0,0001 ant. insula d.                                  |
| 26537 | 0,0744  | -0,0451   | 0,0214         |                           | -0,0937 | 0,1401 dorsomedial PFC ctx ant.                        |
| 27456 | 0,2354  | 0,0115    | 0,0013         |                           | 0,0624  | 0,3348 mid. frontal gyr. ant.                          |
| 26472 | 0,0678  | 0,0176    | -0,0170        |                           | 0,0960  | 0,1315 R inf. frontal sulcus                           |
| 28065 | 0,4291  | -0,0062   | 0,0219         |                           | -0,0416 | 0,5118 frontal pole lat.                               |
| 24158 | 0,0009  | 0,1053    | 0,0026         |                           | 0,1750  | 0,0040 somatomot. net. dorsolat.                       |
| 27358 | 0,2112  | 0,0468    | -0,0128        |                           | 0,0657  | 0,3072 d. visual stream                                |
| 25336 | 0,0103  | 0,0335    | -0,0648        |                           | 0,1348  | 0,0287 parieto occipital sulcus                        |
| 26791 | 0,1055  | 0,0331    | -0,0011        |                           | 0,0851  | 0,1777 lat. visual net. post.                          |
| 27260 | 0,1889  | -0,0121   | -0,0303        |                           | 0,0691  | 0,2811 presupplementary mot. ctx                       |
| 29179 | 0,9469  | 0,0046    | -0,0157        |                           | -0,0035 | 0,9552 sup. frontal gyr. ant.                          |
| 23573 | 0,0002  | 0,0985    | -0,0279        |                           | 0,1950  | 0,0010 sup. parietal lobule                            |
| 26726 | 0,0967  | 0,0216    | -0,0239        |                           | 0,0873  | 0,1719 L intraparietal sulcus, mid. frontal gyr. post. |
| 28927 | 0,8178  | 0,0026    | 0,0067         |                           | -0,0121 | 0,8441 mid. temporal gyr. post.                        |

**Table S2.4** Difference in individual similarity with 22q11.2 deletion FC-signature in individuals with idiopathic schizophrenia and controls

| U     | p_value | median_SZ | media_Control | rank_biserial_correlation | q_value | node_name                                       |
|-------|---------|-----------|---------------|---------------------------|---------|-------------------------------------------------|
| 28309 | 0,5273  | 0,0113    | 0,0478        | -0,0332                   | 0,7970  | putamen                                         |
| 25145 | 0,0072  | 0,0710    | 0,0053        | 0,1413                    | 0,0343  | post. insula v.                                 |
| 27687 | 0,3000  | 0,0027    | -0,0044       | 0,0545                    | 0,5818  | cereb vermis                                    |
| 21358 | 0,0000  | 0,0801    | -0,0067       | 0,2706                    | 0,0000  | thalamus                                        |
| 28826 | 0,7672  | 0,0188    | 0,0153        | 0,0156                    | 0,8768  | cereb viiiab                                    |
| 26752 | 0,1001  | -0,0064   | -0,0247       | 0,0864                    | 0,2465  | cereb i-v                                       |
| 24415 | 0,0016  | 0,0562    | -0,0445       | 0,1662                    | 0,0125  | ant. cingulate ctx d.                           |
| 27328 | 0,2042  | 0,0166    | -0,0182       | 0,0667                    | 0,4667  | caudate nucleus head, nucleus accumbens         |
| 27901 | 0,3696  | 0,0101    | -0,0136       | 0,0472                    | 0,6224  | temporal pole                                   |
| 26317 | 0,0540  | 0,0193    | -0,0308       | 0,1013                    | 0,1440  | dorsomedial PFC ctx post.                       |
| 28745 | 0,7273  | -0,0051   | 0,0009        | -0,0183                   | 0,8768  | cereb crus-II R                                 |
| 28740 | 0,7249  | -0,0123   | -0,0141       | 0,0185                    | 0,8768  | cereb crus-I                                    |
| 28404 | 0,5684  | -0,0152   | 0,0039        | -0,0300                   | 0,7970  | L inf. frontal sulcus                           |
| 21329 | 0,0000  | 0,0716    | -0,0368       | 0,2716                    | 0,0000  | somatomot. net. ventrolat.                      |
| 29123 | 0,9179  | 0,0119    | 0,0200        | -0,0054                   | 0,9476  | cereb viib                                      |
| 28076 | 0,4333  | 0,0037    | -0,0201       | 0,0412                    | 0,6782  | fusiform gyr. medial                            |
| 28397 | 0,5654  | 0,0105    | 0,0068        | 0,0302                    | 0,7970  | caudate nucleus                                 |
| 22715 | 0,0000  | 0,0723    | -0,0248       | 0,2243                    | 0,0002  | post. insula d.                                 |
| 26092 | 0,0382  | 0,0269    | -0,0250       | 0,1089                    | 0,1110  | post. cingulate ctx, precuneus                  |
| 25308 | 0,0098  | 0,0199    | -0,0457       | 0,1357                    | 0,0369  | L inf. parietal lobule                          |
| 25173 | 0,0076  | 0,0186    | -0,0427       | 0,1403                    | 0,0343  | post. cingulate ctx d.                          |
| 28575 | 0,6461  | 0,0118    | 0,0171        | -0,0241                   | 0,8614  | inf. temporal gyr.                              |
| 25188 | 0,0078  | 0,0109    | -0,0448       | 0,1398                    | 0,0343  | supramarginal gyr.                              |
| 26258 | 0,0494  | 0,0214    | -0,0338       | 0,1033                    | 0,1374  | mid. temporal gyr. ant.                         |
| 22054 | 0,0000  | 0,0379    | -0,0482       | 0,2468                    | 0,0000  | amygdala, hippocampus                           |
| 27725 | 0,3117  | 0,0233    | -0,0173       | 0,0532                    | 0,5860  | frontal eye field                               |
| 27753 | 0,3205  | 0,0199    | -0,0190       | 0,0522                    | 0,5860  | visual net. mediod.                             |
| 28414 | 0,5728  | 0,0207    | 0,0226        | -0,0296                   | 0,7970  | occipitotemporal gyr. lat.                      |
| 28660 | 0,6862  | -0,0133   | -0,0074       | 0,0212                    | 0,8768  | cereb vi                                        |
| 25224 | 0,0084  | 0,0262    | -0,0236       | 0,1386                    | 0,0343  | post. visual net. medial                        |
| 28797 | 0,7528  | 0,0024    | 0,0086        | -0,0166                   | 0,8768  | R inf. parietal lobule                          |
| 27456 | 0,2354  | 0,0082    | -0,0005       | 0,0624                    | 0,5022  | inf. marginal sulcus                            |
| 28606 | 0,6606  | -0,0223   | 0,0127        | -0,0231                   | 0,8628  | medial visual net. post.                        |
| 27934 | 0,3811  | 0,0195    | 0,0235        | -0,0460                   | 0,6254  | perigenual ant. cingulate ctx                   |
| 28079 | 0,4344  | -0,0025   | -0,0056       | 0,0411                    | 0,6782  | medial visual net. ant.                         |
| 28821 | 0,7647  | -0,0026   | 0,0256        | 0,0157                    | 0,8768  | ant. insula v., peri insular sulcus             |
| 26409 | 0,0619  | -0,0412   | 0,0045        | -0,0981                   | 0,1584  | precuneus d.                                    |
| 28373 | 0,5548  | 0,0137    | -0,0106       | 0,0310                    | 0,7970  | lat. visual net. ant.                           |
| 27892 | 0,3664  | 0,0038    | -0,0005       | 0,0475                    | 0,6224  | R mid. frontal gyr. post.                       |
| 28942 | 0,8253  | 0,0015    | -0,0148       | -0,0116                   | 0,9152  | fusiform gyr. lat.                              |
| 27323 | 0,2030  | 0,0140    | 0,0013        | 0,0669                    | 0,4667  | orbitofrontal ctx                               |
| 24770 | 0,0034  | 0,0321    | -0,0328       | 0,1541                    | 0,0215  | v. medial PFC ctx                               |
| 28950 | 0,8294  | 0,0054    | 0,0075        | 0,0113                    | 0,9152  | post. visual net. lat.                          |
| 25238 | 0,0086  | 0,0178    | -0,0288       | 0,1381                    | 0,0343  | cereb crus-II L                                 |
| 26080 | 0,0374  | 0,0356    | -0,0027       | 0,1094                    | 0,1110  | somatomot. net. medial                          |
| 21051 | 0,0000  | 0,0779    | -0,0302       | 0,2811                    | 0,0000  | auditory net.                                   |
| 25621 | 0,0173  | 0,0443    | -0,0077       | 0,1250                    | 0,0584  | postcentral sulcus                              |
| 22710 | 0,0000  | 0,0296    | -0,0575       | 0,2244                    | 0,0002  | cereb ix                                        |
| 28447 | 0,5875  | 0,0138    | 0,0030        | 0,0285                    | 0,8000  | R intraparietal sulcus, pars orbitalis          |
| 25798 | 0,0236  | 0,0196    | -0,0248       | 0,1190                    | 0,0754  | ventrolat. PFC ctx                              |
| 24693 | 0,0029  | 0,0669    | -0,0166       | 0,1567                    | 0,0203  | ant. insula d.                                  |
| 29214 | 0,9650  | 0,0032    | -0,0011       | 0,0023                    | 0,9803  | dorsomedial PFC ctx ant.                        |
| 27576 | 0,2676  | 0,0191    | -0,0080       | 0,0583                    | 0,5352  | mid. frontal gyr. ant.                          |
| 27512 | 0,2501  | 0,0101    | -0,0142       | 0,0604                    | 0,5163  | R inf. frontal sulcus                           |
| 29251 | 0,9842  | -0,0039   | 0,0094        | -0,0011                   | 0,9842  | frontal pole lat.                               |
| 23770 | 0,0003  | 0,0782    | -0,0217       | 0,1882                    | 0,0031  | somatomot. net. dorsolat.                       |
| 28990 | 0,8497  | -0,0080   | -0,0037       | -0,0100                   | 0,9217  | d. visual stream                                |
| 25124 | 0,0069  | 0,0529    | -0,0436       | 0,1420                    | 0,0343  | parieto occipital sulcus                        |
| 28707 | 0,7088  | -0,0213   | 0,0109        | -0,0196                   | 0,8768  | lat. visual net. post.                          |
| 25371 | 0,0110  | -0,0067   | -0,0534       | 0,1336                    | 0,0392  | presupplementary mot. ctx                       |
| 29108 | 0,9102  | 0,0046    | 0,0083        | -0,0059                   | 0,9476  | sup. frontal gyr. ant.                          |
| 27853 | 0,3531  | 0,0389    | 0,0105        | 0,0488                    | 0,6224  | sup. parietal lobule                            |
| 27380 | 0,2165  | 0,0031    | 0,0292        | -0,0650                   | 0,4777  | L intraparietal sulcus, mid. frontal gyr. post. |
| 29078 | 0,8948  | -0,0080   | 0,0064        | -0,0070                   | 0,9476  | mid. temporal gyr. post.                        |

**Table S2.5** Difference in individual similarity with 16p11.2 deletion FC-signature in individuals with idiopathic ADHD and controls

| U     | p_value | median_ADHD | median_Control | rank_biserial_correlation | q_value | node_name                                       |
|-------|---------|-------------|----------------|---------------------------|---------|-------------------------------------------------|
| 9780  | 0,7393  | -0,0019     | 0,0189         | -0,0230                   | 0,9725  | putamen                                         |
| 9893  | 0,8658  | 0,0218      | 0,0185         | 0,0117                    | 0,9734  | post. insula v.                                 |
| 9662  | 0,6143  | -0,0066     | 0,0081         | 0,0348                    | 0,9725  | cereb vermis                                    |
| 9877  | 0,8476  | 0,0350      | 0,0020         | 0,0133                    | 0,9734  | thalamus                                        |
| 9267  | 0,2816  | 0,0284      | -0,0133        | 0,0742                    | 0,9725  | cereb viiiab                                    |
| 9862  | 0,8306  | -0,0108     | -0,0017        | 0,0148                    | 0,9734  | cereb i-v                                       |
| 9185  | 0,2318  | 0,0520      | -0,0070        | 0,0824                    | 0,9725  | ant. cingulate ctx d.                           |
| 9299  | 0,3028  | 0,0257      | -0,0169        | 0,0710                    | 0,9725  | caudate nucleus head, nucleus accumbens         |
| 9850  | 0,8171  | 0,0069      | -0,0006        | 0,0160                    | 0,9734  | temporal pole                                   |
| 9487  | 0,4486  | 0,0181      | 0,0086         | 0,0522                    | 0,9725  | dorsomedial PFC ctx post.                       |
| 9914  | 0,8898  | 0,0202      | 0,0314         | 0,0096                    | 0,9734  | cereb crus-II R                                 |
| 9264  | 0,2796  | -0,0182     | -0,0042        | -0,0745                   | 0,9725  | cereb crus-I                                    |
| 9791  | 0,7513  | 0,0163      | 0,0002         | 0,0219                    | 0,9725  | L inf. frontal sulcus                           |
| 9481  | 0,4434  | 0,0444      | 0,0937         | -0,0528                   | 0,9725  | somatomot. net. ventrolat.                      |
| 9274  | 0,2861  | 0,0259      | 0,0148         | 0,0735                    | 0,9725  | cereb viib                                      |
| 9739  | 0,6948  | 0,0019      | 0,0131         | -0,0271                   | 0,9725  | fusiform gyr. medial                            |
| 9284  | 0,2927  | -0,0139     | -0,0365        | 0,0725                    | 0,9725  | caudate nucleus                                 |
| 9382  | 0,3628  | 0,0725      | 0,0263         | 0,0627                    | 0,9725  | post. insula d.                                 |
| 10003 | 0,9925  | 0,0061      | 0,0148         | 0,0007                    | 0,9925  | post. cingulate ctx, precuneus                  |
| 9139  | 0,2068  | -0,0224     | 0,0056         | -0,0870                   | 0,9725  | L inf. parietal lobule                          |
| 9818  | 0,7812  | -0,0100     | 0,0121         | -0,0192                   | 0,9725  | post. cingulate ctx d.                          |
| 9147  | 0,2110  | 0,0112      | -0,0412        | 0,0862                    | 0,9725  | inf. temporal gyr.                              |
| 8785  | 0,0758  | 0,0394      | -0,0190        | 0,1224                    | 0,9725  | supramarginal gyr.                              |
| 9570  | 0,5239  | 0,0008      | 0,0013         | 0,0440                    | 0,9725  | mid. temporal gyr. ant.                         |
| 9267  | 0,2816  | 0,0174      | -0,0081        | 0,0742                    | 0,9725  | amygdala, hippocampus                           |
| 9926  | 0,9036  | -0,0396     | 0,0142         | 0,0084                    | 0,9734  | frontal eye field                               |
| 9248  | 0,2694  | 0,0194      | -0,0309        | 0,0761                    | 0,9725  | visual net. mediod.                             |
| 9805  | 0,7668  | -0,0010     | -0,0058        | 0,0205                    | 0,9725  | occipitotemporal gyr. lat.                      |
| 9097  | 0,1857  | 0,0343      | -0,0126        | 0,0912                    | 0,9725  | cereb vi                                        |
| 9080  | 0,1777  | -0,0249     | 0,0163         | -0,0929                   | 0,9725  | post. visual net. medial                        |
| 9664  | 0,6163  | -0,0271     | -0,0289        | -0,0346                   | 0,9725  | R inf. parietal lobule                          |
| 9182  | 0,2301  | 0,0792      | -0,0139        | 0,0827                    | 0,9725  | inf. marginal sulcus                            |
| 8751  | 0,0680  | 0,0297      | -0,0237        | 0,1258                    | 0,9725  | medial visual net. post.                        |
| 9809  | 0,7712  | 0,0048      | -0,0134        | 0,0201                    | 0,9725  | perigenual ant. cingulate ctx                   |
| 9380  | 0,3613  | 0,0182      | -0,0229        | 0,0629                    | 0,9725  | medial visual net. ant.                         |
| 9324  | 0,3202  | 0,0162      | 0,0010         | 0,0685                    | 0,9725  | ant. insula v., peri insular sulcus             |
| 9748  | 0,7045  | -0,0080     | 0,0009         | -0,0262                   | 0,9725  | precuneus d.                                    |
| 9736  | 0,6916  | 0,0144      | 0,0274         | -0,0274                   | 0,9725  | lat. visual net. ant.                           |
| 9316  | 0,3145  | 0,0373      | 0,0155         | 0,0693                    | 0,9725  | R mid. frontal gyr. post.                       |
| 9533  | 0,4895  | 0,0097      | 0,0276         | -0,0477                   | 0,9725  | fusiform gyr. lat.                              |
| 9539  | 0,4950  | 0,0204      | -0,0088        | 0,0471                    | 0,9725  | orbitofrontal ctx                               |
| 9971  | 0,9555  | 0,0065      | -0,0144        | 0,0039                    | 0,9765  | v. medial PFC ctx                               |
| 9474  | 0,4374  | 0,0102      | -0,0147        | 0,0535                    | 0,9725  | post. visual net. lat.                          |
| 9738  | 0,6938  | 0,0087      | 0,0136         | -0,0272                   | 0,9725  | cereb crus-II L                                 |
| 9976  | 0,9613  | 0,0962      | 0,0216         | -0,0034                   | 0,9765  | somatomot. net. medial                          |
| 9674  | 0,6266  | 0,0846      | 0,0640         | 0,0336                    | 0,9725  | auditory net.                                   |
| 9826  | 0,7901  | 0,0712      | 0,0296         | -0,0184                   | 0,9725  | postcentral sulcus                              |
| 9734  | 0,6895  | 0,0231      | -0,0031        | 0,0276                    | 0,9725  | cereb ix                                        |
| 9509  | 0,4679  | 0,0036      | -0,0200        | 0,0500                    | 0,9725  | R intraparietal sulcus, pars orbitalis          |
| 9670  | 0,6225  | 0,0445      | 0,0301         | 0,0340                    | 0,9725  | ventrolat. PFC ctx                              |
| 9576  | 0,5296  | -0,0358     | -0,0011        | -0,0434                   | 0,9725  | ant. insula d.                                  |
| 9310  | 0,3104  | 0,0232      | -0,0051        | 0,0699                    | 0,9725  | dorsomedial PFC ctx ant.                        |
| 9153  | 0,2142  | -0,0003     | -0,0230        | 0,0856                    | 0,9725  | mid. frontal gyr. ant.                          |
| 9667  | 0,6194  | -0,0018     | 0,0152         | -0,0343                   | 0,9725  | R inf. frontal sulcus                           |
| 9663  | 0,6153  | 0,0141      | -0,0211        | 0,0347                    | 0,9725  | frontal pole lat.                               |
| 9573  | 0,5267  | 0,0028      | 0,0897         | -0,0437                   | 0,9725  | somatomot. net. dorsolat.                       |
| 9787  | 0,7469  | 0,0337      | -0,0104        | 0,0223                    | 0,9725  | d. visual stream                                |
| 9350  | 0,3389  | -0,0133     | 0,0314         | -0,0659                   | 0,9725  | parieto occipital sulcus                        |
| 9453  | 0,4196  | -0,0176     | 0,0345         | -0,0556                   | 0,9725  | lat. visual net. post.                          |
| 9641  | 0,5931  | -0,0300     | -0,0216        | 0,0369                    | 0,9725  | presupplementary mot. ctx                       |
| 9947  | 0,9278  | 0,0092      | -0,0227        | 0,0063                    | 0,9734  | sup. frontal gyr. ant.                          |
| 9899  | 0,8727  | 0,0573      | 0,0463         | -0,0111                   | 0,9734  | sup. parietal lobule                            |
| 9509  | 0,4679  | 0,0347      | -0,0419        | 0,0500                    | 0,9725  | L intraparietal sulcus, mid. frontal gyr. post. |
| 9937  | 0,9163  | 0,0213      | 0,0135         | -0,0073                   | 0,9734  | mid. temporal gyr. post.                        |

**Table S2.6** Difference in individual similarity with 22q11.2 deletion FC-signature in individuals with idiopathic ADHD and controls

| U     | p_value | median_ADHD | median_Control | rank_biserial_correlation | q_value | node_name                                       |
|-------|---------|-------------|----------------|---------------------------|---------|-------------------------------------------------|
| 9665  | 0,6174  | -0,0189     | -0,0048        | 0,0345                    | 0,8781  | putamen                                         |
| 9816  | 0,7790  | 0,0092      | 0,0003         | 0,0194                    | 0,8781  | post. insula v.                                 |
| 9099  | 0,1867  | 0,0323      | -0,0168        | 0,0910                    | 0,8725  | cereb vermis                                    |
| 9572  | 0,5258  | -0,0030     | 0,0652         | -0,0438                   | 0,8781  | thalamus                                        |
| 8770  | 0,0722  | -0,0392     | 0,0456         | -0,1239                   | 0,6669  | cereb viiiab                                    |
| 9970  | 0,9543  | -0,0170     | -0,0083        | -0,0040                   | 0,9695  | cereb i-v                                       |
| 8552  | 0,0345  | 0,0742      | -0,0120        | 0,1457                    | 0,6063  | ant. cingulate ctx d.                           |
| 9765  | 0,7229  | -0,0175     | 0,0083         | -0,0245                   | 0,8781  | caudate nucleus head, nucleus accumbens         |
| 9215  | 0,2492  | -0,0205     | 0,0221         | -0,0794                   | 0,8725  | temporal pole                                   |
| 9664  | 0,6163  | 0,0171      | -0,0053        | 0,0346                    | 0,8781  | dorsomedial PFC ctx post.                       |
| 9334  | 0,3273  | 0,0038      | 0,0395         | -0,0675                   | 0,8725  | cereb crus-II R                                 |
| 8773  | 0,0729  | -0,0327     | 0,0229         | -0,1236                   | 0,6669  | cereb crus-I                                    |
| 10005 | 0,9948  | 0,0294      | 0,0195         | 0,0005                    | 0,9948  | L inf. frontal sulcus                           |
| 9831  | 0,7957  | -0,0074     | 0,0009         | 0,0179                    | 0,8781  | somatomot. net. ventrolat.                      |
| 8578  | 0,0379  | -0,0253     | 0,0256         | -0,1431                   | 0,6063  | cereb viib                                      |
| 9424  | 0,3958  | -0,0148     | 0,0011         | -0,0585                   | 0,8781  | fusiform gyr. medial                            |
| 9693  | 0,6462  | -0,0052     | 0,0227         | -0,0317                   | 0,8781  | caudate nucleus                                 |
| 9362  | 0,3477  | -0,0193     | -0,0230        | 0,0647                    | 0,8725  | post. insula d.                                 |
| 9627  | 0,5791  | 0,0056      | -0,0057        | 0,0383                    | 0,8781  | post. cingulate ctx, precuneus                  |
| 9085  | 0,1800  | -0,0149     | 0,0284         | -0,0924                   | 0,8725  | L inf. parietal lobule                          |
| 9346  | 0,3359  | 0,0280      | 0,0124         | 0,0663                    | 0,8725  | post. cingulate ctx d.                          |
| 9371  | 0,3545  | -0,0269     | 0,0009         | -0,0638                   | 0,8725  | inf. temporal gyr.                              |
| 9695  | 0,6483  | -0,0117     | -0,0033        | 0,0315                    | 0,8781  | supramarginal gyr.                              |
| 9566  | 0,5201  | 0,0376      | -0,0096        | 0,0444                    | 0,8781  | mid. temporal gyr. ant.                         |
| 9590  | 0,5429  | 0,0005      | -0,0001        | -0,0420                   | 0,8781  | amygdala, hippocampus                           |
| 9864  | 0,8329  | -0,0225     | 0,0060         | -0,0146                   | 0,9035  | frontal eye field                               |
| 9591  | 0,5439  | -0,0155     | -0,0006        | -0,0419                   | 0,8781  | visual net. mediod.                             |
| 9487  | 0,4486  | 0,0007      | 0,0130         | -0,0522                   | 0,8781  | occipitotemporal gyr. lat.                      |
| 8297  | 0,0130  | -0,0262     | 0,0371         | -0,1711                   | 0,6063  | cereb vi                                        |
| 8742  | 0,0660  | -0,0271     | 0,0182         | -0,1267                   | 0,6669  | post. visual net. medial                        |
| 9898  | 0,8715  | -0,0008     | 0,0014         | -0,0112                   | 0,9144  | R inf. parietal lobule                          |
| 9276  | 0,2874  | 0,0065      | -0,0256        | 0,0733                    | 0,8725  | inf. marginal sulcus                            |
| 9298  | 0,3021  | -0,0164     | 0,0049         | -0,0711                   | 0,8725  | medial visual net. post.                        |
| 9653  | 0,6052  | 0,0132      | 0,0116         | 0,0357                    | 0,8781  | perigenual ant. cingulate ctx                   |
| 9643  | 0,5951  | 0,0063      | 0,0117         | -0,0367                   | 0,8781  | medial visual net. ant.                         |
| 9552  | 0,5070  | -0,0065     | -0,0048        | -0,0458                   | 0,8781  | ant. insula v., peri insular sulcus             |
| 9485  | 0,4469  | -0,0378     | 0,0128         | -0,0524                   | 0,8781  | precuneus d.                                    |
| 9252  | 0,2720  | -0,0189     | 0,0154         | -0,0757                   | 0,8725  | lat. visual net. ant.                           |
| 8956  | 0,1266  | 0,0050      | -0,0187        | 0,1053                    | 0,8148  | R mid. frontal gyr. post.                       |
| 8960  | 0,1280  | -0,0250     | -0,0015        | -0,1049                   | 0,8148  | fusiform gyr. lat.                              |
| 9882  | 0,8533  | 0,0174      | -0,0081        | -0,0128                   | 0,9102  | orbitofrontal ctx                               |
| 9725  | 0,6799  | -0,0096     | 0,0225         | -0,0285                   | 0,8781  | v. medial PFC ctx                               |
| 8578  | 0,0379  | -0,0595     | 0,0081         | -0,1431                   | 0,6063  | post. visual net. lat.                          |
| 9205  | 0,2433  | -0,0085     | 0,0430         | -0,0804                   | 0,8725  | cereb crus-II L                                 |
| 9922  | 0,8990  | 0,0026      | 0,0212         | 0,0088                    | 0,9280  | somatomot. net. medial                          |
| 9809  | 0,7712  | -0,0016     | 0,0047         | -0,0201                   | 0,8781  | auditory net.                                   |
| 9770  | 0,7283  | -0,0118     | 0,0096         | -0,0240                   | 0,8781  | postcentral sulcus                              |
| 9181  | 0,2296  | -0,0101     | 0,0251         | -0,0828                   | 0,8725  | cereb ix                                        |
| 9234  | 0,2607  | -0,0099     | -0,0353        | 0,0775                    | 0,8725  | R intraparietal sulcus, pars orbitalis          |
| 9708  | 0,6619  | -0,0056     | -0,0181        | 0,0302                    | 0,8781  | ventrolat. PFC ctx                              |
| 9802  | 0,7635  | -0,0009     | -0,0088        | -0,0208                   | 0,8781  | ant. insula d.                                  |
| 9537  | 0,4932  | 0,0138      | -0,0028        | 0,0473                    | 0,8781  | dorsomedial PFC ctx ant.                        |
| 9336  | 0,3287  | 0,0157      | -0,0278        | 0,0673                    | 0,8725  | mid. frontal gyr. ant.                          |
| 9770  | 0,7283  | -0,0117     | -0,0090        | 0,0240                    | 0,8781  | R inf. frontal sulcus                           |
| 9823  | 0,7868  | -0,0124     | -0,0346        | -0,0187                   | 0,8781  | frontal pole lat.                               |
| 9636  | 0,5881  | 0,0083      | 0,0104         | 0,0374                    | 0,8781  | somatomot. net. dorsolat.                       |
| 9729  | 0,6842  | 0,0012      | 0,0124         | -0,0281                   | 0,8781  | d. visual stream                                |
| 9427  | 0,3982  | -0,0082     | -0,0303        | 0,0582                    | 0,8781  | parieto occipital sulcus                        |
| 8837  | 0,0891  | -0,0316     | -0,0100        | -0,1172                   | 0,7125  | lat. visual net. post.                          |
| 9302  | 0,3049  | -0,0005     | -0,0205        | 0,0707                    | 0,8725  | presupplementary mot. ctx                       |
| 9824  | 0,7879  | 0,0286      | -0,0227        | 0,0186                    | 0,8781  | sup. frontal gyr. ant.                          |
| 8992  | 0,1400  | 0,0014      | 0,0435         | -0,1017                   | 0,8148  | sup. parietal lobule                            |
| 9710  | 0,6640  | 0,0149      | 0,0000         | 0,0300                    | 0,8781  | L intraparietal sulcus, mid. frontal gyr. post. |
| 9791  | 0,7513  | 0,0157      | -0,0070        | -0,0219                   | 0,8781  | mid. temporal gyr. post.                        |



**Table S3.1** Correlation of individual similarity with 16p11.2 deletion FC-signature and FSIQ in ASD

| pearson_r | p_value | q_value | node_name                      |
|-----------|---------|---------|--------------------------------|
| -0,0811   | 0,0839  | 0,1411  | putamen                        |
| -0,0163   | 0,7292  | 0,8102  | thalamus                       |
| -0,0554   | 0,2381  | 0,3401  | temporal pole                  |
| -0,0866   | 0,0649  | 0,1411  | somatomot. net. ventrolat.     |
| -0,1112   | 0,0177  | 0,1217  | caudate nucleus                |
| 0,0470    | 0,3172  | 0,3965  | post. cingulate ctx, precuneus |
| -0,1005   | 0,0322  | 0,1217  | perigenual ant. cingulate ctx  |
| 0,0035    | 0,9400  | 0,9400  | v. medial PFC ctx              |
| -0,0981   | 0,0365  | 0,1217  | cereb crus-II L                |
| -0,0809   | 0,0847  | 0,1411  | ant. insula d.                 |

**Table S3.2** Correlation of individual similarity with 22q11.2 deletion FC-signature and FSIQ in ASD

| pearson_r | p_value | q_value | node_name                      |
|-----------|---------|---------|--------------------------------|
| -0,1033   | 0,0276  | 0,0829  | putamen                        |
| -0,0518   | 0,2700  | 0,3375  | thalamus                       |
| -0,1068   | 0,0226  | 0,0829  | temporal pole                  |
| -0,0742   | 0,1139  | 0,1898  | somatomot. net. ventrolat.     |
| -0,0344   | 0,4648  | 0,5164  | caudate nucleus                |
| -0,0654   | 0,1639  | 0,2341  | post. cingulate ctx, precuneus |
| -0,1263   | 0,0070  | 0,0697  | perigenual ant. cingulate ctx  |
| -0,0999   | 0,0332  | 0,0829  | v. medial PFC ctx              |
| -0,0891   | 0,0575  | 0,1150  | cereb crus-II L                |
| 0,0014    | 0,9754  | 0,9754  | ant. insula d.                 |

**Table S3.3** Correlation of individual similarity with 16p11.2 deletion FC-signature and ADOS severity in ASD

| pearson_r | p_value | q_value | node_name                      |
|-----------|---------|---------|--------------------------------|
| 0,1559    | 0,0175  | 0,0584  | putamen                        |
| 0,1006    | 0,1266  | 0,2110  | thalamus                       |
| -0,0283   | 0,6684  | 0,7427  | temporal pole                  |
| 0,1437    | 0,0287  | 0,0717  | somatomot. net. ventrolat.     |
| 0,1896    | 0,0038  | 0,0375  | caudate nucleus                |
| -0,0934   | 0,1563  | 0,2233  | post. cingulate ctx, precuneus |
| 0,1623    | 0,0133  | 0,0584  | perigenual ant. cingulate ctx  |
| -0,0804   | 0,2225  | 0,2782  | v. medial PFC ctx              |
| -0,0193   | 0,7695  | 0,7695  | cereb crus-II L                |
| 0,1206    | 0,0667  | 0,1335  | ant. insula d.                 |

**Table S3.4** Correlation of individual similarity with 22q11.2 deletion FC-signature and ADOS severity in ASD

| pearson_r | p_value | q_value | node_name                      |
|-----------|---------|---------|--------------------------------|
| 0,1315    | 0,0455  | 0,0910  | putamen                        |
| 0,1481    | 0,0241  | 0,0601  | thalamus                       |
| 0,1859    | 0,0045  | 0,0450  | temporal pole                  |
| 0,0562    | 0,3940  | 0,4378  | somatomot. net. ventrolat.     |
| 0,0809    | 0,2197  | 0,3139  | caudate nucleus                |
| 0,1572    | 0,0165  | 0,0551  | post. cingulate ctx, precuneus |
| 0,1633    | 0,0127  | 0,0551  | perigenual ant. cingulate ctx  |
| 0,1231    | 0,0613  | 0,1021  | v. medial PFC ctx              |
| 0,0650    | 0,3244  | 0,4055  | cereb crus-II L                |
| 0,0295    | 0,6551  | 0,6551  | ant. insula d.                 |
